## **Afadin and zyxin contribute to coupling between cell junctions and contractile actomyosin networks during apical constriction**

Mark M. Slabodnick<sup>1,2¶\*</sup>, Sophia C. Tintori<sup>1,3¶</sup>, Mangal Prakash<sup>4</sup>, Christopher D. Higgins<sup>1</sup>,  
Alicia H. Chen<sup>1</sup>, Timothy D. Cupp<sup>1</sup>, Terrence Wong<sup>1</sup>, Emily Bowie<sup>1</sup>, Florian Jug<sup>4,5</sup>, Bob  
Goldstein<sup>1,6</sup>

1. Biology Department, University of North Carolina at Chapel Hill, Chapel Hill, North Carolina, United States of America
2. Department of Biology, Knox College, Galesburg, Illinois, United States of America
3. Current address: Department of Biology, and Center for Genomics and Systems Biology, New York University, New York, United States of America
4. Max Planck Institute of Molecular Cell Biology and Genetics, Dresden, Germany
5. Fondazione Human Technopole, Milan, Italy
6. Lineberger Comprehensive Cancer Center, University of North Carolina at Chapel Hill, Chapel Hill, North Carolina, United States of America

<sup>†</sup> equal contributions

\*corresponding author

Email: [mmslabodnick@knox.edu](mailto:mmslabodnick@knox.edu) (MMS)

Short title: Coupling junctions to actomyosin in apical constriction

## **Abstract**

One of the most common cell shape changes driving morphogenesis in diverse animals is the constriction of the apical cell surface. Apical constriction depends on contraction of an actomyosin network in the apical cell cortex, but such actomyosin networks have been shown to undergo continual, conveyor belt-like contractions even before the shrinking of an apical surface begins. This finding suggests that apical constriction is not necessarily triggered by the contraction of actomyosin networks, but rather by unidentified, temporally-regulated mechanical links between actomyosin and junctions. Here, we used *C. elegans* gastrulation as a model to identify proteins that contribute to such linkage. We found that  $\alpha$ -catenin and  $\beta$ -catenin initially failed to move centripetally with contracting cortical actomyosin networks, suggesting that linkage is regulated between cadherin-catenin complexes and actomyosin. We used a proteomic approach to identify AFD-1/afadin and transcriptomics to identify ZYX-1/zyxin as contributors to *C. elegans* gastrulation. We found that a zyxin family of LIM domain proteins have transcripts that become enriched in multiple cells just before they undergo apical constriction. Using a new, semi-automated image analysis tool, we found that AFD-1/afadin and ZYX-1/zyxin both contribute to cell-cell junctions' centripetal movement in concert with contracting actomyosin networks. These results identify two key proteins as important for actomyosin networks to effectively pull cell-cell junctions inward during apical constriction. The transcriptional upregulation of zyxin/ZYX-1 in specific cells points to one way that developmental patterning spatiotemporally regulates cell biological mechanisms *in vivo*. Because afadin- and zyxin-family proteins contribute to membrane-cytoskeleton linkage in other systems, we anticipate that their roles in regulating apical constriction in this manner may be conserved.

## **Author summary**

Animals take shape during development in large part by the bending of tissues, and failures in this process are common causes of human birth defects. Such tissue bending is driven primarily by individual cells changing shape: in many examples, one side of a cell shrinks, pulling on junctions that connect the cell to neighboring cells. But the networks that drive one side of a cell to shrink are not always connected to junctions. As a result, focus has turned to understanding how connections between such networks and junctions are dynamically regulated to trigger cell shape change. We sought to identify genes that contribute to these critical connections. Here, we describe proteomic and transcriptomic methods that we used to identify two proteins that contribute to cell shape change. We developed a new image analysis tool and used it to reveal that loss of these two genes results in networks moving without efficiently pulling in junctions. Our results pinpoint two key genes whose products might contribute to dynamically connecting networks to junctions to trigger tissue shape changes in other organisms.

## **Introduction**

During embryogenesis, molecular forces drive the tissue shape changes that give form to the developing organism (1). Among the mechanisms that drive such tissue shape changes, apical constriction is one of the most commonly used (2). For example, the neural tube of vertebrate embryos forms as some cells of the neural plate constrict apically, bending the neural plate into a tube and internalizing from the embryo's surface (3). Neural tube formation fails frequently in human development (4). Understanding the mechanisms that control changes to cell shape is essential to understanding disease states as well as the fundamental mechanisms by which embryos develop.

The force-producing mechanisms that drive apical constriction are well conserved, relying on cortical networks of actin filaments and non-muscle myosin II motors, which drive

contraction of the apical cell cortex (5). The forces that contract the apical cell cortex are transmitted to neighboring cells through apical cell junctions. As a result, the contraction of a cortical network shrinks the exposed apical surface of the cell (6,7). How this mechanism is developmentally regulated, driving specific cells to constrict their apical surfaces at specific times, remains incompletely understood in most model systems (2,8).

The nematode *Caenorhabditis elegans* has been a valuable model for studying mechanisms of morphogenesis (9). Gastrulation in *C. elegans* begins at the 26-cell stage when a non-muscle myosin II becomes enriched in the apical cortex of two endodermal precursor cells (EPCs) (10), which then internalize by apical constriction (11,12).

A previous study investigated actomyosin dynamics in the EPCs during gastrulation and found, unexpectedly, that contractions of the actomyosin cortex initially occurred in a conveyor belt-like fashion without pulling junctions centripetally, i.e., with junctions apparently uncoupled to the inward movement of actomyosin components toward the center of the apical cell surface (13). It was only after several minutes of seemingly unproductive actomyosin contractions that cell-cell junctions began to move increasingly in concert with the contracting networks. This phenomenon was also observed in *Drosophila melanogaster* shortly before ventral furrow formation, where myosin accumulated and coalesced periodically in weak contractions that preceded the shrinking of apical cell profiles (13). These observations suggest that in these model systems, and potentially more generally, apical constriction is not triggered by myosin activation; rather, it is likely to be triggered by gradually connecting an already-contracting apical actomyosin cytoskeleton to cell-cell junctions, via unknown links.

Although many proteins have been identified at sites of cadherin-based adhesion that could feasibly serve as such temporally regulated links (14), the specific, temporally-regulated links relevant to triggering apical constriction are not yet known in any

system. Identifying such links is an important step toward understanding how developmental mechanisms orchestrate the cytoskeletal mechanisms of apical constriction with spatial and temporal precision.

Here, we sought to identify proteins that could contribute such links either directly or indirectly. We anticipated that identifying such proteins would require integrating diverse methodologies including generating some new resources. First, we hypothesized that temporal regulation of apical constriction could feasibly result from either the transcriptional regulation or posttranscriptional regulation of key linking proteins, or both. We found that members of the *C. elegans* cadherin-catenin complex (CCC) remained stable at junctions as cortical actomyosin contractions began, suggesting that disassembly of these complexes cannot explain junctions' initial failure to move. We then used both proteomic and transcriptomic approaches to find proteins that might interact physically with the *C. elegans* CCC as well as genes whose expression is upregulated specifically in the EPCs prior to cell internalization. Screening through the resulting candidates identified two genes, *afd-1/afadin* and *zyx-1/zyxin*, that encoded possible linkers and were required for timely internalization of the EPCs. We found that AFD-1/afadin is localized broadly to cell junctions with patterns consistent with members of the CCC. Single-cell RNA-seq on multiple internalizing cells identified *zyx-1/zyxin* and other LIM domain-encoding genes as upregulated in multiple internalizing *C. elegans* cell lineages. To determine whether *zyx-1/zyxin* and *afd-1/afadin* contribute to linking contracting actomyosin networks to junctions *in vivo*, we developed a new, semi-automated image analysis workflow for quantifying actomyosin network and junctional movements. The results demonstrated that *zyx-1/zyxin* and *afd-1/afadin* contribute to the coupling of actomyosin contractions to the cell-cell junctions, identifying zyxin and afadin as contributors to the triggering of apical constriction.



## **Results**

### **Cortical actomyosin initially contracts away from stable cadherin-catenin complexes**

We considered that the failure of initial contractions of actomyosin networks to pull cell-cell junctions inward in *C. elegans* gastrulation (13) might be explained by an initial failure of  $\alpha$ -catenin and/or  $\beta$ -catenin to remain stably at cell-cell junctions with cadherin. To test this hypothesis, we filmed embryos expressing fluorescent tags inserted into the native locus of each protein without disrupting each protein's function (15). As expected, mKate2-tagged HMR-1/cadherin localized at apical cell-cell junctions, along with GFP:: $\beta$ -catenin and HMP-1/ $\alpha$ -catenin::GFP (Fig. 1). We visualized the movements of actomyosin along with the CCC components during the early stage, when there are uncoupled contractions (2-8 minutes after the initiation of cytokinetic furrow formation in MSa and MSp cells (13)) using strains co-expressing a red fluorescently tagged non-muscle myosin II heavy chain (NMY-2::mKate) along with a GFP-tagged CCC component. We mounted these embryos ventrally to visualize *en face* centripetal actomyosin dynamics in the apical cortices of endoderm precursor cells (EPCs). During this early stage, we observed robust centripetal movement of myosin particles, but the bulk of the  $\alpha$ -catenin-GFP and GFP- $\beta$ -catenin remained stably at junctions, and failed to move centripetally (Fig. 1). We conclude that the initial inability of contracting actomyosin networks to efficiently pull cell-cell junctions centripetally cannot be explained by  $\alpha$ -catenin and/or  $\beta$ -catenin being pulled away from cadherin at cell-cell junctions. Although F-actin can associate with  $\alpha$ -catenin in other systems, and this connection can be strengthened under force (16), these results imply that a strong connection between actomyosin and junctional  $\alpha$ -catenin is initially missing in this system. We next sought to identify proteins that might contribute to this connection.



## Identification of candidate proteins that might contribute to coupling of contracting actomyosin networks and junctions

We used two screening approaches to identify proteins that could feasibly contribute to connecting actomyosin to junctions in EPCs: We screened for proteins from early-stage embryos that co-immunoprecipitate (co-IP) with  $\alpha$ -catenin, and proteins whose mRNAs become enriched in EPCs just prior to the onset of apical constriction. To screen for proteins that co-IP with  $\alpha$ -catenin, we used a strain expressing endogenously-tagged HMP-1::GFP/ $\alpha$ -catenin. We performed co-IP using anti-GFP antibodies to pull down the CCC and any associated proteins. Because we were interested in proteins present during gastrulation in early embryogenesis, we enriched our samples for early stage (<50 cell) embryos (see Methods). We used a strain expressing soluble GFP alone as a control from which to subtract contaminating proteins that co-purify with GFP. Our initial list of co-IP'd proteins contained each of the other CCC proteins at high peptide counts as expected, confirming that we pulled down intact CCCs from early stage embryos (Supplementary Table 3). Our list also contained more than 200 other proteins with at least one detectable peptide. We expect that this list includes proteins that interact with  $\alpha$ -catenin in one or more cells as well as false positives. We view the possibility that the list may be enriched for gene products of interest as sufficient for our purpose of further screening. We further narrowed this list to only candidates whose genes were predicted to be expressed before or during the 24-cell stage of development using published single-cell mRNA sequencing data (17), and we removed common housekeeping genes (see Methods). This resulted in 11 candidates with the potential to physically interact with the CCC for further screening (Table 1, candidates with >0 peptide counts).

Gastrulation in *C. elegans* relies on embryonic transcription (18). To identify a second set of candidates from genes expressed specifically in EPCs, we referred to single-cell

RNA-seq data of the first several cell cycles of development (17). We considered genes whose mRNAs were enriched in EPCs compared to the rest of the embryo just prior to apical constriction (i.e. in the endodermal precursor cell E at the 8-cell stage, or its daughter cells Ea and Ep at the 24-cell stage). From this list, we selected 21 genes whose mRNAs were enriched at least 8-fold in EPCs at the 8-cell stage (16 genes) or the 24-cell stage (5 genes).

To identify genes from both lists above that contribute to gastrulation *in vivo*, we then screened candidates by RNA interference (RNAi). Rather than feeding bacteria expressing double-stranded RNAs (dsRNAs), we used the more laborious method of injecting dsRNAs targeting each gene, in order to maximize the likelihood of strongly disrupting gene functions (19). We filmed embryos released from injected mothers and examined them for a gastrulation-defective (Gad) phenotype, defined as the two EPCs failing to fully internalize (i.e. with part of at least one of the cells not covered by any other cells) or failing to stay internalized at the time the EPCs divided. Our RNAi screening identified 21 candidate genes with at least a low frequency Gad phenotype (Table 1).

Among the genes we identified were two genes encoding proteins known to associate directly or indirectly with junctional proteins and/or actin networks in *C. elegans* or other organisms: *afd-1/afadin* and *zyx-1/zyxin* (14,20–23). The *Drosophila* afadin homolog Canoe is required along with  $\beta$ -catenin for medioapical actomyosin to remain connected to adherens junctions during apical constriction (24,25). We first pursued *afd-1/afadin*'s roles in *C. elegans* apical constriction. *zyx-1/zyxin* is discussed further below.

| dsRNA target     | Peptide Counts | Stage (Cell #) | Enrichment (Mean RPKM in E over Embryo) | % Gad (#/N)  |
|------------------|----------------|----------------|-----------------------------------------|--------------|
| Negative Control | N/A            | N/A            | --                                      | 0 (0/20)     |
| <i>acp-2</i>     | 0              | 16             | 1084 / 121                              | 12.5 (2/16)  |
| <i>add-1</i>     | 0              | 8              | 11 / 0                                  | 7.7 (1/13)   |
| <i>afd-1</i>     | 1              | 8              | 10 / 2                                  | 25 (5/20)    |
| C01H6.2          | 5              | 16             | 40 / 7                                  | 21.4 (3/14)  |
| C26F1.1          | 0              | 16             | 879 / 98                                | 0 (0/9)      |
| C29F7.2          | 0              | 16             | 1231 / 137                              | 27.3 (3/11)  |
| C46E10.8         | 0              | 8              | 146 / 20                                | 50.0 (6/12)  |
| <i>ctn-1</i>     | 0              | 8              | 65 / 14                                 | 20.0 (2/10)  |
| <i>dve-1</i>     | 0              | 16             | 1124 / 126                              | 0 (0/16)     |
| F25D7.5          | 0              | 8              | 52 / 7                                  | 0 (0/15)     |
| F44E5.1          | 3              | N/A            | Not Enriched                            | 5.8 (1/17)   |
| F49E10.4         | 0              | 8              | 171 / 22                                | 0 (0/13)     |
| <i>gdi-1</i>     | 3              | N/A            | Not Enriched                            | 100% sterile |
| <i>gei-4</i>     | 1              | N/A            | Not Enriched                            | 41.6 (5/12)  |
| <i>grdn-1</i>    | 0              | 8              | 13 / 3                                  | 33.3 (3/9)   |
| H24G06.1         | 0              | 8              | 64 / 9                                  | 14.3 (2/14)  |
| <i>hum-8</i>     | 0              | 16             | 33 / 4                                  | 66.7 (6/9)   |
| <i>inx-3</i>     | 1              | N/A            | Not Enriched                            | 0 (0/12)     |
| <i>let-4</i>     | 0              | 8              | 34 / 4                                  | 0 (0/17)     |
| <i>lin-66</i>    | 2              | N/A            | Not Enriched                            | 0 (0/9)      |
| <i>noah-1</i>    | 2              | 16             | 71 / 9                                  | 30.8 (4/13)  |
| <i>pssy-1</i>    | 0              | 8              | 179 / 38                                | 7.1 (1/14)   |
| R06B10.2         | 0              | 8              | 8 / 1                                   | 71.4 (5/7)   |
| <i>sym-1</i>     | 2              | 16             | 6 / 2                                   | 0 (0/17)     |
| T14E8.1          | 0              | 8              | 18 / 3                                  | 18.2 (2/12)  |
| T19B10.2         | 2              | 16             | 416 / 46                                | 0 (0/11)     |
| <i>tnc-2</i>     | 0              | 8              | 68 / 9                                  | 0 (0/9)      |
| Y38H6C.14        | 1              | 8 ; 16         | 15 / 3 ; 21 / 4                         | 29.4 (5/17)  |
| Y53C10A.10       | 0              | 8              | 3 / 0                                   | 8.3 (2/12)   |
| Y57G11C.6        | 0              | 8              | 41 / 5                                  | 30 (3/10)    |
| <i>zig-5</i>     | 0              | 8              | 34 / 5                                  | 31.3 (5/16)  |
| <i>zyx-1</i>     | 0              | 8              | 96 / 12                                 | 25 (5/20)    |

**Table 1.** Genes Identified from a Combined Proteomic and Transcriptomic Screen for candidates. Gene names,  $\alpha$ -catenin co-IP peptide counts, and EPC mRNA enrichment for each candidate are presented. Primers were designed to amplify each target gene sequence from cDNA (Supplementary Table 3). Each dsRNA was injected into young adults of the wild-type *N2* strain of *C. elegans*. Embryos laid by injected worms were scored 24 hours after injection, filmed by DIC microscopy, and examined for Gad phenotypes. *gdi-1* RNAi resulted in 100% sterility, failing to produce embryos for analysis, as seen previously (26).

### *afd-1/afadin* contributes to gastrulation and co-localizes with the CCC

Afadin is a known actin-binding protein and a component of adherens junctions with critical functions in many systems (20,25,27–31). *C. elegans afd-1/afadin* genetically interacts with *sax-7/L1CAM*, which has functional redundancy with the CCC during gastrulation (28,32), and AFD-1/afadin had been found previously to co-IP with CCC components in *C. elegans* (33). We found that *afd-1* RNAi resulted in Gad phenotypes in 25% of embryos (Fig. 2A), and in all cases these defects were subtle: Only a small portion of the apically constricting EPC surface remained exposed to the exterior at the time of the next cell division (Fig. 2A,B), suggesting that AFD-1/afadin has a partially redundant role in *C. elegans* gastrulation.

To gain more insight into AFD-1/afadin's role at junctions, we examined its localization by using CRISPR to endogenously tag the N-terminus of *afd-1* with the red fluorophore mKate2. mKate2::AFD-1 localized to cell junctions throughout the early embryo, including in the apically constricting EPCs (Fig. 2C). To determine if junctional mKate2::AFD-1 colocalized with members of the CCC, we generated a dual-labeled strain containing both mKate2::AFD-1 and a functional, endogenously-tagged HMR-1/cadherin::GFP (15). We found that the two proteins colocalized closely at cell junctions (Fig. 2D).

Previously, interactions have been found between afadin and  $\alpha$ -catenin in mammalian systems (34,35). To determine if any CCC components influence mKate2::AFD-1's ability to localize to junctions, we targeted other CCC components by RNAi (Fig. 3A, B). Interestingly, we saw a marked reduction of junctional levels of mKate2::AFD-1 in embryos injected with *hmr-1/cadherin* dsRNA but not *hmp-1/α-catenin* dsRNA, suggesting that, in *C. elegans*, afadin requires HMR-1/cadherin but not HMP-1/α-catenin for recruitment to junctions (Fig. 3C, D). We similarly investigated a

potential role for SAX-7/L1CAM in recruiting AFD-1 to junctions but did not see a reduction in mKate2::AFD-1 junctional levels in *sax-7* RNAi embryos (Fig. 3C, D). Previous experiments have shown that the CCC becomes apically enriched near the border between the two apically constricting EPCs, in response to myosin activity (15). mKate2::AFD-1 also was apically enriched at this site (Fig. 2E, 2F). Taken together, we conclude that AFD-1/afadin localizes to adherens junctions, where it is recruited directly or indirectly by cadherin.

#### RNA-seq of internalizing cell types to search for transcripts enriched in apically constricting cells of multiple cell lineages

Multiple cell lineages of the early *C. elegans* embryo internalize by apical constriction (10,36). Our identification of 21 genes with enriched expression in just one of these lineages, the EPCs, made us wonder if there exist any *C. elegans* genes with expression enriched in multiple independently internalizing cell types. No such gene might exist, but we considered this issue worth investigating because if such a gene existed, we would consider it to be a candidate for a master regulator of apical constriction, akin to snail family genes that drive another cell shape change – epithelial-to-mesenchymal transitions – in multiple animal models (37–40).

To answer this question, we collected cells from the other internalizing cell lineages for RNA-seq (Supplementary Fig. 1). We selected in total four groups of internalizing cells to study – MS descendants, E descendants, D descendants, and descendants of Cap and Cpp, hereafter referred to together as Cxp descendants (Fig. 4A, red circles). We also selected two non-internalizing groups as negative controls – ABp descendants (because only 2 out of 32 great-great granddaughter cells of ABp internalize) and Cxa descendants (none of which internalize) (36).

For each cell type above, we sought to identify transcripts whose abundance increased during the cell cycles leading up to internalization. To do this, we needed two transcriptomes from each internalizing cell lineage – one before internalization, and one at the start of internalization. For the “before” time point we chose 2-3 cell cycles before cell internalization. To exclude transcripts that become broadly enriched in all cell types over the course of development regardless of morphogenetic behavior, we made use of the two non-internalizing cell types, choosing time points around the 16-cell stage and the 100 cell stage, to match the timing of most of our other samples (Fig. 4A, black circles). All transcriptomes from the 1- to 15-cell stages were previously published (17), and in this study we expanded the previous resource with transcriptomes from sets of cells chosen specifically to investigate internalizing lineages. We present the results of the cumulative transcript dataset as a resource in an interactive online form, to facilitate querying the dataset, using the Differential Expression Gene Explorer, at <http://dredge.bio.unc.edu/c-elegans-transcriptional-lineage-with-late-gastrulation/> (Permalink: <https://n2t.net/ark:/84478/d/2bbpmsq3>) (41).

To identify any transcripts that become enriched in internalizing cell types, we filtered the 7,998 transcripts that we detected (see Methods) for those that became enriched at least two-fold over time in at least two of the four internalizing cell types, and that did not become enriched by more than two-fold in the two negative control, non-internalizing cell types. This analysis yielded 839 genes.

Of the four internalizing cell types sampled, all but the E lineage generate some muscle cells (all D descendants, all Cxp descendants, and 17/52 MS descendants will become body muscle) (42). To avoid genes that are exclusively associated with muscle fate, we filtered the 839 transcripts for those that become enriched over time in the E lineage and at least one other internalizing lineage. This reduced the number of transcripts to 445.

During development, the ABp lineage (mostly non-internalizing cells) splits from a lineage containing all of the internalizing cells we sampled (all P<sub>1</sub> descendants) at the two cell stage, leaving the possibility that comparisons between ABp and internalizing cell types would highlight transcripts that are differentially enriched at the two-cell stage, rather than an internalization-correlated enrichment. To avoid this bias, we filtered the 445 genes for only genes whose transcripts are enriched by at least two-fold in the internalizing C descendants (Cxp) compared to the non-internalizing C descendants (Cxa). This reduced our filtered list to 150 genes. From this list we removed genes whose maximum transcript abundance in any non-internalizing cell types exceeded by more than two-fold the transcript abundance in the internalizing cell types where enrichment had been found. This left us with 99 genes.

Of the 99 remaining genes (Figure 4B), 55 transcripts were enriched in two of the four internalizing cell types, 33 were enriched in three of the four, and 11 were enriched in all four (as in the complete internalization-correlated pattern shown in Fig. 4C).

These 11 transcripts were *cav-1* (encoding a caveolin homolog), *pcp-5* (peptidase), *kbp-2* (kinetochore binding protein), *cya-1* (cyclin), *rps-21* (small ribosomal subunit), *fbxc-39* (F-box C protein), *upb-1* (hydrolase), *ver-3* (VEGF receptor), *fbxb-78* (F-box b gene), Y75B8A.14 (GTPase with a human ortholog), and *klp-19* (kinesin motor protein). Although these genes had transcripts that became enriched over time in all four internalizing cell lineages, all 11 were either only weakly expressed in some of the internalizing cells or exhibited relatively high expression in some non-internalizing cells as well (Supplementary Fig. 3).

We conclude that no single gene can be found by this kind of RNA-seq analysis that satisfies our expectations for a *C. elegans* master regulator of apical constriction in multiple cell lineages. Therefore, we considered next the possibility that multiple members of a gene family might fulfill this role in different cell types.

## Transcripts encoding a family of zyxin-related LIM domain proteins become enriched in multiple apically constricting cells

To expand our analysis to include groups of genes that are similar to each other in sequence, we created groups of genes based on similarity (see Methods) and calculated a cumulative transcript profile for each such homology group by summing the transcript profiles of all the homologous genes in the group (as shown in the last pictogram in Figure 4C). We evaluated each of these summed transcript profiles for correlation with gastrulating cells using the same steps that we had used to identify the individual genes, above. We removed homology groups whose internalization-specific expression pattern could be attributed to a single gene that we had already identified. This analysis yielded 51 homology groups, 27 of which had transcripts that become enriched in two of the four internalizing cell types, 21 of which had transcripts that become enriched in three of the four internalizing cell types, and three homology groups whose transcripts become enriched in all four internalizing cell types.

Of the three homology groups whose transcripts become enriched in all four internalizing cell types, two groups included genes with F-box domains (Supplemental Files 1 and 2). None of the genes in these two groups have a known function or known orthologs outside of the Caenorhabditid nematodes. The third group consisted of three genes encoding proteins that have LIM domains; *lim-9* (an ortholog of LIMPET in *Drosophila* and FHL2 in vertebrates), *pxl-1* (an ortholog of paxillin in *Drosophila* and vertebrates), and the *zyx-1/zyxin* gene that we had identified in a separate set of experiments above.

Within this homology group, *zyx-1* transcripts were enriched in the E lineage as described above; *lim-9* transcripts were enriched in Cxp descendants (i.e., the cells of the C lineage that internalize); and *pxl-1* transcripts were enriched in MS descendants and D descendants (Fig. 4C). These genes encode proteins whose homologs are involved in actin



filament organization in muscle cells (43–46), focal adhesions and mechanotransduction (47,48), stretch-induced gene expression (49), planar cell polarity and asymmetric cell division (50). LIM domain-containing proteins have been shown to interact physically with components of the actin cytoskeleton such as vinculin and  $\alpha$ -actinin (43). We consider members of this protein family as interesting candidates for regulators of cell behaviors during gastrulation based on the transcript enrichments that we found, their broad conservation across animals, as well as their known involvement in cytoskeletal organization.

Therefore, we attempted to test whether these LIM domain-containing genes are required during gastrulation in their respective cell lineages. We targeted each candidate individually by dsRNA injection, filmed embryos, and assayed for gastrulation defects among the internalizing cell lineages in which each candidate was found to be upregulated. Besides *zyx-1* RNAi (see Table 1), none of the candidates yielded gastrulation defects in their respective cell lineages (*pxl-1* RNAi, 0% Gad, n = 24 ; *lim-9* RNAi, 0% Gad, n = 46). We confirmed *zyx-1/zyxin*'s role in gastrulation by generating a CRISPR knockout of *zyx-1* (*zyx-1* $\Delta$ , LP831), removing the protein coding region and replacing it with a cassette encoding a codon-optimized GFP expressed under the control of the *myo-2* promoter, driving expression in the pharynx to allow for easy visual identification of the allele. Consistent with the phenotype seen by RNAi, we also found gastrulation defects in the knockout strain. This phenotype was more penetrant than we had observed in the *zyx-1* dsRNA injection (58.8% vs. 25%; 10/17 Gad embryos, Fig. 4D). Because complex genetic redundancy among a multi-gene family and/or failure to sufficiently knock down transcript levels by RNAi might have prevented us from observing phenotypes after *pxl-1* RNAi and *lim-9* RNAi, and because we had found that targeting *zyx-1/zyxin* did result in gastrulation

defects, we decided to set aside work on the larger set of LIM domain proteins to focus on characterizing ZYX-1/zyxin's role in EPCs during gastrulation.

Before examining whether ZYX-1 is involved in linking junctions to contracting apical actomyosin networks, we attempted to characterize its localization. We anticipated that the low level of *zyx-1/zyxin* transcripts that we detected in EPCs might make it difficult to visualize protein localization. Previous authors have reported that *zyx-1/zyxin* produces 2 protein isoforms: a longer, 603 amino acid isoform called ZYX-1a, and a shorter, 200 amino acid isoform called ZYX-1b (43). ZYX-1a contains 3 polyproline-rich repeats, a predicted nuclear export signal, and 3 tandem LIM domains (Supplementary Fig. 4A). We created a strain with mNeonGreen (mNG) inserted at the endogenous N-terminus to tag ZYX-1a, but consistent with its low predicted expression at this stage of development, we were unable to detect mNG signal in the EPC (Supplementary Fig. 4B and C). In young adults we could see mNG::ZYX-1a readily in body wall muscle, neurons, gonads, and spermatheca, where its expression was previously described (43,51) (Supplementary Fig. 4D). To assess where ZYX-1 could associate in cells, we examined where over-expressed ZYX-1 would localize using single-copy transgenes driven by the *sdz-1* promoter (*Psdz-1*), which is predicted to drive ~20-fold overexpression compared to *zyx-1* expression levels in EMS, E, and MS cell lineages (Supplementary Fig. 4E). We created two mNG-tagged constructs: one expressing full length ZYX-1a, and another expressing only the LIM domain-containing region (LCR) of ZYX-1 to examine where the LCR alone could direct localization. For both constructs, cytoplasmic mNG signal could be detected in E and MS cells as predicted, and small foci could be detected at the apical surfaces of internalizing EPCs (Supplementary Fig. 4E, inset). Additionally, the predicted nuclear export signal of ZYX-1a appeared to be functional in full-length mNG::ZYX-1a, because mNG::ZYX-1a was excluded from the nucleus while mNG::LCR<sup>ZYX-1</sup> was not (Supplementary Fig. 4F). We conclude that ZYX-1a is likely

expressed normally at too low a level to detect by current methods as EPCs internalize, and that it and its LCR can be recruited to apical foci in EPCs when overexpressed. One hypothesis consistent with our expression data and our phenotype data is that zyxin is a limiting component required for triggering apical constriction that is expressed only briefly and at a low level at the onset of cell internalization. We attempted to test this hypothesis using the *Psdz-1* overexpression construct to see if expressing zyxin early and at higher than normal levels might result in early cell internalization, but we did not see cell internalization occurring earlier in this strain (Supplementary Fig. 5). Next, we investigated whether ZYX-1/zyxin and AFD-1/afadin are involved in coupling cell junctions to contracting actomyosin networks during gastrulation.

#### Development of a semi-automated image analysis workflow to quantify the degree to which myosin and membrane movements are coupled *in vivo*

To determine whether ZYX-1/zyxin and AFD-1/afadin are required for coupling actomyosin to cell junctions in EPCs, we constructed a dual-labeled strain to visualize myosin particles as well as plasma membranes, to serve as a proxy for cell-cell junctions. We used an existing strain with endogenously-tagged NMY-2/myosin bearing an N-terminal fusion to an mNeonGreen (mNG) fluorophore (52) and inserted a single-copy transgene containing the bright red fluorophore mScarlet-I (mSc) (53) fused to the pleckstrin homology domain from phospholipase C- $\delta$ 1 (PH domain), which localizes to plasma membranes. We then collected dual-color 4D confocal videos of membrane and myosin dynamics throughout the process of apical constriction (Fig. 5A).

Previously reported methods for quantifying actomyosin and junction movements used a manual method to analyze a relatively small number of datapoints, with a significant time investment (13). To increase throughput and to ensure unbiased analysis, we

developed a semi-automated pipeline to assess membrane and myosin movements.

Because this is a new pipeline, including new code (freely available; see Methods), we describe briefly below each of three steps that we used: (1) cell segmentation, (2) myosin flow computation and (3) analysis of the correlation between membrane and myosin movement.

First, to calculate membrane movement we performed a coarse segmentation of the Ea and Ep cells using Labkit (54). We used Labkit to train a random forest classifier to recognize (i) cell interior, ie. pixels in the apical cortex's interior, (ii) cell membrane (border), and (iii) background, ie. everything else. For each time-lapse, a total of 1-2 minutes were required to draw a few manual annotations for each pixel class and train the random forest classifier (Fig. 5B, left). Automatic segmentations were then manually reviewed and adjusted to ensure that the borders of Ea and Ep cells were properly segmented (Fig. 5B, right). These adjustments were especially needed where Ea or Ep had no neighbors visible in the imaged plane, to prevent incompletely segmented objects from merging into one another (Fig. 5B inset, arrowhead). Total segmentation and curation time was on average about 10-15 minutes per film.

Second, for computing myosin flow, we first reduced image noise. The 3D myosin films are often noisy because of a limited photon budget due to the photosensitivity of the sample. To increase the signal to noise ratio, we first denoised the movies with Noise2Void (55), a self-supervised denoising method. Although Noise2Void has not been shown to introduce any unwanted artifacts in denoised outputs, we manually checked several randomly selected time points to ensure that the denoising performed well (Fig. 5C). We then generated a maximum intensity Z-projection and used these for myosin flow quantification.

We computed myosin flows using the Farnebäck Optical Flow (56) implementation in OpenCV (57), only considering the optical flow for myosin particles that lie along vectors drawn between the membrane and either the cell centroid or centers of myosin flow (Fig. 5D). We hereafter refer to such vectors as centripetal vectors. Additionally, we considered only the purely centripetal components of these vectors, since only this component contributes to movement of the membrane in this direction (Fig. 5D, yellow arrows). To limit our analysis to only actomyosin that might contribute to coupling at cell junctions, we defined a two-micron window at the outer border of the centripetal vectors near the cell border for each time point and only considered myosin flows that fell in this region and were moving centripetally (Fig 5D, yellow shaded region).

Third, we analyzed the degree to which myosin and membrane movements were coupled. For each pair of time points and for each centripetal vector, we calculated the net membrane movement vector and the net myosin movement vector (average of all centripetal myosin vectors). This calculated difference in the movement of membrane and myosin is defined as the slippage rate, as described previously (13).

This analysis recapitulated the finding by Roh-Johnson et al. 2012 that there is slippage between myosin and membrane movements in wild-type embryos, as well as a significant decrease in such slippage over time (Fig 6A, B; Table 2). We found lower myosin and slippage rates overall than previously. This is not unexpected, because our new workflow enables analysis of optical flow that considers smaller myosin particles than before, whose movements would be expected to be more affected by brownian motion.

### Afadin and zyxin affect coupling of cell junctions with contracting actomyosin networks

Having developed a semi-automated method for analyzing myosin and membrane movement, we sought to determine whether AFD-1/afadin and ZYX-1/zyxin were required for the membrane to move centripetally along with actomyosin contractions. We used our strain labeled with mNG::*NMY-2* and mSc::*PH* and performed RNAi targeting *afd-1*. We performed experiments involving *zyx-1* using our CRISPR-generated *zyx-1*  $\Delta$ , which we crossed into the dual-labeled strain.

The observed rates of myosin movement appeared to be unaffected by the loss of either *afd-1* or *zyx-1*: The mean myosin velocities measured by our image analysis method across all conditions were similar to one another (wild-type control = 1.79  $\mu\text{m}/\text{min}$ , *afd-1* RNAi = 1.73, *zyx-1*  $\Delta$  = 1.78, *zyx-1*  $\Delta$  + *afd-1* RNAi = 1.71  $\mu\text{m}/\text{min}$ ; Fig. 6A). This result confirmed to us that *afd-1* and *zyx-1* are unlikely to affect apical constriction of EPCs through unanticipated effects on myosin velocities.

We observed defects in the coupling of myosin and membrane movements in all experimental conditions. We found that *afd-1* RNAi resulted in a smaller change in the slippage rate over time as compared to control (control = 0.77  $\mu\text{m}/\text{min}$  decrease in slippage rate,  $p = 0.006$ ; *afd-1* RNAi = 0.44  $\mu\text{m}/\text{min}$  decrease,  $p = 0.058$ ) (Figure 6B; Table 2). *zyx-1*  $\Delta$  (LP831, cp419) embryos also showed little difference between early and late stages in mean slippage rates (0.25  $\mu\text{m}/\text{min}$  decrease,  $p = 0.300$ ) (Figure 6B; Table 2). To determine if AFD-1 and ZYX-1 might function partially redundantly, we performed *afd-1* RNAi in the *zyx-1*  $\Delta$  strain. *zyx-1*  $\Delta$  + *afd-1* RNAi embryos displayed coupling defects in mean slippage rates between early and late stages that were not significantly different ( $p = 0.901$ ) than *zyx-1*  $\Delta$  on its own (Figure 6, right; Table 2). Taken together, we conclude from the results that these two

proteins identified by our screens, AFD-1 and ZYX-1, both contribute directly or indirectly to the degree to which cell-cell junctions move with the contracting actomyosin cytoskeleton.

| Condition                      | Mean Slippage ( $\mu\text{m}/\text{min}$ ) |      | Mean Difference | 95% C.I. |      | Early vs. Early Control $p$ -value | Early vs. Late $p$ -value | N |
|--------------------------------|--------------------------------------------|------|-----------------|----------|------|------------------------------------|---------------------------|---|
|                                | Early                                      | Late |                 | Early    | Late |                                    |                           |   |
| <i>Control</i>                 | 1.59                                       | 0.82 | 0.77            | 0.21     | 0.53 | -                                  | 0.006                     | 6 |
| <i>afd-1 (RNAi)</i>            | 1.40                                       | 0.96 | 0.44            | 0.23     | 0.59 | 0.141                              | 0.058                     | 7 |
| <i>zyx-1 ko</i>                | 1.46                                       | 1.21 | 0.25            | 0.19     | 0.43 | 0.267                              | 0.300                     | 6 |
| <i>afd-1 (RNAi) + zyx-1 ko</i> | 1.36                                       | 1.20 | 0.16            | 0.22     | 0.22 | 0.081                              | 0.495                     | 9 |

Table 2: Per-embryo slippage differences between early and late stages.

## **Discussion**

In cells undergoing apical constriction, cortical actomyosin contractions can begin before the apical sides of cells constrict (13). This finding suggested that apical constriction may be triggered by regulating connections between already-contracting apical actomyosin networks and apical junctions. Here, we sought to identify molecules that could contribute directly or indirectly to such connections. We used proteomic and transcriptomic approaches to identify new genes that contribute to normal gastrulation in *C. elegans*. Among these were two genes encoding proteins of families already known to indirectly connect actin networks and membrane proteins in other contexts. We found that *afd-1/afadin* and *zyx-1/zyxin* were required for the normal reduction of slippage over time between junctions and contracting actomyosin networks. Our work also produced two new resources available to other researchers: transcriptomes of multiple gastrulating lineages from *C. elegans* (available in interactive online form to facilitate querying the dataset) and a semi-automated method for analyzing myosin and membrane movement. Together, our results identify two key proteins that may contribute directly or indirectly to a previously-hypothesized molecular clutch for apical constriction (13).

Afadin has known functions in apical constriction, including connecting membrane proteins to F-actin (25), supporting junctional integrity (60), and maintaining apical/basal polarity (30). Afadin was first identified as an actin-binding protein localized to CCC-based adherens junctions in mice (20). Prior to this study in *C. elegans*, *afd-1* had been shown to genetically interact with *sax-7/L1CAM* during gastrulation (28). Although the precise role of *sax-7/L1CAM* is not well understood during gastrulation in *C. elegans*, *sax-7* is partially redundant with *hmr-1/cadherin* (32), and afadin has been found in other systems to interact with both nectin, which is another immunoglobulin cell-adhesion molecule (IgCAM) not directly related to *sax-7*, (61) and CCC adhesion complexes (34,35). Therefore, it is possible that afadin has conserved interactions with both CCC-based and IgCAM-based adhesion, and loss of afadin could affect both to some degree. Our data suggest that AFD-1 localization at junctions in *C. elegans* depends on HMR-1/cadherin but not HMP-1/ $\alpha$ -catenin or SAX-7/L1CAM, which is surprising given previous literature in other systems that suggests an interaction between afadin and  $\alpha$ -catenin (34,35). It is possible that multivalent interactions between multiple junctional proteins (62,63) contribute to recruiting AFD-1 to junctions. While afadin is required for proper gastrulation and coordination of junctions with actomyosin contractions, its protein expression is not restricted to only the apically constricting cells. We speculate that AFD-1/afadin might be post-translationally regulated differently in EPCs than in other cells, where some centripetal myosin flow occurs as well (13), or that afadin contributes to junctional stability in general alongside EPC-specific mechanisms.

Because gastrulation in *C. elegans* relies on embryonic transcription (18), we hypothesized that regulators of *C. elegans* gastrulation can be identified by changes in the transcriptome. Our single-cell transcriptome analysis identified a family of LIM domain-containing proteins as specifically upregulated in internalizing cells. LIM domains



are composed of tandem zinc fingers and share a few conserved residues required for the coordination of zinc ions (44,64). Proteins containing LIM domains play evolutionarily conserved structural roles supporting actin networks under stress (65). Some LIM proteins like LMO7 might directly regulate apical myosin activity (66). Smallish is an LMO7 homolog in flies that localizes to the zonula adherens, binds to PAR polarity complex proteins as well as canoe/afadin, and regulates morphogenesis and actomyosin contractility (67). Because our LIM domain-containing candidate proteins were specifically enriched just before the onset of cell internalization, it was our hypothesis that apically constricting cells may rely on different LIM domain-containing proteins to successfully internalize. Although we found that RNAi of only one LIM domain-containing candidate had an effect on cell internalization, we cannot rule out the possibility that genetic redundancy or incomplete RNAi penetrance contributed to the lack of an observable phenotype after targeting the two other LIM domain genes that we identified. Genetic redundancy is common among morphogenesis mechanisms in various systems (68–70).

The only LIM domain-containing protein that had a measurable effect on cell internalization was *zyx-1/zyxin*, which is expressed in the EPCs. Zyxin is a tension-sensitive protein that can bind actin filaments under stress (23,48). In humans, the zyxin-family of LIM proteins contains several members, including Ajuba, WTIP, TRIP-6, and others. There is substantial precedent for zyxin-like proteins contributing to apical constriction in other systems, by incompletely defined mechanisms. WTIP is important for apical constriction in *Xenopus* (71), where it localizes to junctions. In human keratocytes, Ajuba localizes to junctions via an interaction with  $\alpha$ -catenin (72) and is required for Rac activation and E-cadherin-dependent adhesion (73). In *Drosophila melanogaster*, Ajuba has also been shown to localize to junctions via interaction with  $\alpha$ -catenin that is dependent on myosin-induced tension (74). *zyx-1/zyxin* is the sole zyxin family member in *C. elegans* and

is required for proper muscle function (43). Endogenous tags of zyx-1 were too dim to be visualized, likely because expression in the EPCs is too low. Therefore, we do not know if ZYX-1 localizes to junctions and/or to actin networks in EPCs, leaving the mechanism by which it affects gastrulation and apical constriction an open question.

Our study reveals that both afadin and zyxin contribute to proper gastrulation and coupling actomyosin contractions to cell-cell junctions. Given the nature of the phenotypes we observed, we suspect that multiple partially redundant mechanisms ensure successful cell internalization. Our single-cell transcriptome data should provide a wealth of data for comparing internalizing cell lineages to their non-internalizing neighbors and yield future insights into mechanisms. Numerous links between CCC, actin, afadin and zyxin/LIM domain-containing proteins have been demonstrated in a variety of systems. Our study suggests that these same proteins might be working together in *C. elegans* specifically to link the forces generated by actomyosin contraction to cell-cell junctions during apical constriction.

## **Materials and Methods**

### *C. elegans* maintenance and strains

Nematodes were cultured and handled as described (75). Strains used in this study are indicated Supplementary Table 1.

### Co-immunoprecipitation and Mass Spectrometry

*C. elegans* expressing either soluble GFP alone as a control or HMP-1::GFP were used for affinity purification of GFP from isolated embryos. Liquid culture and affinity purification of protein complexes from *C. elegans* extracts were performed following previously described methods (76). Briefly, we isolated embryos from unsynchronized liquid cultures by bleaching

and incubated them overnight in M9 media to obtain synchronized L1 larvae, which were then used to start new liquid cultures. Synchronized cultures were allowed to grow until the majority of *C. elegans* were observed to reach adulthood and contain ~5 embryos, to enrich for embryos with <50 cells. At this point, embryos were again harvested by bleaching, washed in M9, transferred to lysis buffer adapted from (77) [20 mM Tris-HCl, pH 7.9; 150 mM NaCl; 10% Glycerol; 1.0 mM; 0.5 mM DTT; 0.05% Triton-X 100; 1 Complete EDTA-free Protease Inhibitor cocktail tablet per 12 mL lysis buffer (Roche Applied Science, #1873580)] and drop frozen in liquid nitrogen. Embryonic extracts were prepared using pulverization and sonication followed by a single-step immunoprecipitation using anti-GFP coupled agarose beads (MBL international, D153-8). Purified protein extracts were submitted for LC-MS/MS analysis at the UNC Michael Hooker Proteomics Center on a Thermo QExactive HF machine (ThermoFisher).

### Candidate Gene Selection

An initial list of 545 candidate proteins from the affinity purification of HMP-1::GFP from embryos was filtered first by removing 315 proteins that shared peptide hits in the soluble GFP control. The remaining 230 proteins all had at least 1 peptide hit. Both HMP-2/ $\beta$ -catenin and HMR-1/cadherin were identified in this pool of candidates with the highest peptide counts, suggesting that our method worked. The remaining candidates were further filtered by ribosomal proteins, elongation factors, and other common housekeeping proteins which reduced the list to 126 proteins. Finally, because synchronization of *C. elegans* is not perfect we only considered candidates with evidence of gene expression in EPCs (17), which reduced our list to 11 proteins expressed in the early embryo with a potential physical interaction with the CCC. Candidates from transcriptome data were initially selected if they showed evidence of transcript enrichment in the EPCs at stages just prior to the onset of

apical constriction (at either the 8-cell or 24-cell stage of development). 21 candidate genes were selected from among those that have at least an 8-fold (i.e. log<sub>2</sub> of 3) enrichment in the EPCs at either of those two stages.

### RNA interference

Primers were designed to amplify ~1000 bp of each target genes' protein coding sequence (Supplementary Table 2). Each primer also included 15 bases of the T7 promoter sequence at the 5' end to be used in a 2-step PCR from wild-type genomic DNA sequence. The PCR product was purified using a Zymo DNA Clean and Concentrator kit (Zymo Research) and used as a template for another round of PCR using primers containing the full-length T7 promoter sequence. After a second purification using a Zymo DNA Clean and Concentrator kit the PCR product was used as a template in a T7 RiboMAX express RNAi System (Promega) following the manufacturer's protocol. Purified dsRNA was injected at a concentration of 500 ng/μL into L4 or young adult hermaphrodites using a Narishige injection apparatus, a Parker Instruments Picospritzer II, and a Nikon Eclipse TE300 microscope with DIC optics. Excess dsRNA was stored at -80°C. Injected worms were allowed to recover on a seeded NGM plate for 24-36 hours at 20°C before harvesting embryos for imaging.

### Assay for gastrulation defects

Gastrulation assays were performed as previously described (21). Briefly, *C. elegans* embryos were dissected in Egg Buffer from dsRNA injected gravid adults and mounted on poly-L-lysine coated coverslips, supported by a 2.5% agarose pad. Four-dimensional differential interference contrast (DIC) microscopy was performed using a Diagnostic Instruments SPOT2 camera mounted on a Nikon Eclipse 800 microscope. Images were

acquired at 1  $\mu\text{m}$  optical sections every 1 minute during embryogenesis and analyzed using ImageJ (78). Embryos were considered gastrulation defective (Gad) if either Ea or Ep divided before it being fully internalized. Imaging was performed at 20°C - 23°C for all strains.

### CRISPR editing

Strains were created using previously reported methods (52,79). Proteins were tagged on either their N- or C-termini after considering the presence of multiple isoforms or knowledge of existing tags in other organisms. For afadin, both N- and C- terminally tagged transgenes have been used previously in other organisms without any reported defects and N-terminally tagged transgenes can rescue lethal phenotypes in flies (31,80,81). Repair templates were first constructed by inserting 500-1000 bp of homologous sequence amplified from genomic worm DNA into a vector on either side of a fluorescent protein and a selection cassette using Gibson Assembly or SapTrap methods (82,83). For the *zyx-1* gene deletion, the homologous sequence was inserted into a vector containing *myo-2* promoter driven GFP as a visible marker of the deletion. Cas9 guide sequences were selected using the CRISPR Design tool ([crispr.mit.edu](http://crispr.mit.edu), no longer available) and cloned into Cas9-sgRNA expression vector DD162 (79) and then co-injected into adult germlines along with the repair template vector and array markers. Selection of edited worms was conducted using previously described methods (52).

### Fluorescence imaging

Laterally mounted embryos were imaged on 2.5% agarose pads, ventrally mounted embryos were imaged using clay feet as spacers between the slide and coverslip. Embryos were

imaged using a spinning disk confocal microscope with a Nikon TiE stand and a 60X 1.4NA Plan Apo immersion oil objective (Nikon), CSUXI spinning disk head (Yokogawa), and an ImagEM EMCCD (Hamamatsu). For analysis of coupling, images were collected in sets where the membrane was imaged on the 1st and 7th frames, and myosin was imaged in every frame. Optical sections of 0.5  $\mu\text{m}$  were collected to a depth of 2  $\mu\text{m}$  from the surface of the embryo. In doing this, a membrane volume was collected every ~34.3 seconds while myosin volumes were collected every ~5.7 seconds. Z-projections were analyzed using ImageJ and our automated analysis pipeline (see Methods below).

#### Quantification of mKate2::AFD-1 levels at Junctions

The analysis of apical enrichment of mKate2::AFD-1 in Ea/p was performed as described previously for members of the CCC (15). The analysis of relative mKate2::AFD-1 levels along junctions was performed on embryos that were isolated from adult worms 24 hours after being injected with dsRNA. Embryos from worms injected with either *hmr-1* or *hmp-1* dsRNA were mounted side-by-side on agar pads with control and oriented such that embryos could be differentiated on the microscope. mKate2::AFD-1 junctional intensity was collected by taking stacks of images 12 microns deep into the embryo. Z-projections of embryos were analyzed using ImageJ to calculate the average intensity along a 50 pixel long, 5 pixel wide line drawn along identical junctions in both the control and experimental conditions. Average fluorescence intensities (fluorescence intensity) were then adjusted by subtracting off-embryo background levels by drawing the same 50 pixel long, 5 pixel wide line in a space adjacent to the embryos for each prepared slide. Adjusted average pixel intensities were normalized to the highest value in each experimental group and plotted to compare Control vs. Experimental junctional intensities. Ratios from each group were calculated by first taking the ratio of the average pixel intensities from each embryo pair, and

then plotting them along with the group averages. Statistical analysis of ratios was performed using a Welch's t-test in the Superplots webtool (<https://huygens.science.uva.nl/SuperPlotsOfData/>, (59)). mKate2::AFD-1 embryos showed a low-penetrance gastrulation defect (1/24 embryos), raising the possibility that our N-terminally tagged-protein had minor effects on its function; this was significantly weaker penetrance than the defects seen by RNAi ( $p = 0.018$ ).

### Worm dissections

Worms were grown and dissected, and RNA was prepared and sequenced, as in Tintori 2016. Briefly, embryos were selected 10-20 minutes before the desired stage, chemically disrupted using a sodium hypochlorite solution and a chitinase/chymotrypsin solution, then mechanically disrupted by agitation via mouth pipette. The only exceptions were that in this study embryos were dissected manually by aspiration on a Yokogawa spinning disk confocal microscope under brightfield illumination, and cell types were identified by fluorescent markers, as illustrated (Supplementary Fig. 1).

### Single embryo transcriptomes and analysis

The transcriptomes already available from our previous study had been generated from single cells (17). To keep any amplification artifacts consistent across datasets, we chose to perform RNA-seq on later time points using material from single embryos rather than bulk-isolated cells. For the same reason, we used the same kit and protocol that had been used for earlier samples (17). Briefly, cDNA was generated using the SMARTer Ultra Low RNA Input for Illumina Sequencing Kit, and sequencing libraries were prepared using the Nextera XT kit. Sets of samples from a single embryo were rejected if one or more libraries

had an over-representation of ERCC spike in reads (if ERCC spike in transcripts were more than 1/10th as abundant as worm transcripts) (84).

With the addition of these new datasets, we have now sequenced transcriptomes for all cell types of the 1-, 2-, 4-, and 8-cell stage, 9 cell types of the 24-cell stage (ABalx, ABarx, ABplx, ABprx, MSx, Ex, Cx, D, and P4), and 5 groups of cells from the 100 cell stage embryo (ABp descendents, "ABp+"; MS descendents, "MS+"; D descendents, "D+"; and internalizing and non-internalizing C descendents, "C-in" and "C-out"), as well as the partially overlapping groups of cells that make up the rest of the embryo from each of those 100 cell stage dissections (e.g. all non-D cells, "D-", to match each set of D cells collected, "D+"). An approximation of the remainder of the 100 cell stage embryo, referred to here as ABa-E-P4, was generated in silico based on weighted averages of other samples from that stage using the following approach. First, a whole embryo average was calculated based on the weighted averages of all dissections from the gastrulating stage (for example, 0.25 x RPKMs for ABp+ plus 0.75x RPKMs for "ABp-", with weightings based loosely on mass of each cell cluster). We then subtracted the weighted values of each of the targeted cell types (subtracting 0.25x"ABp+", 0.0625x"C-in", 0.0625x"C-out", 0.0625x"D+", and 0.125x"D+") from the whole embryo estimate, leaving an estimate of just the ABa-E-P4 RPKM values. A previous study generated transcriptomes for many of these cell types by isolating founder cells starting at the 2- cell stage, and allowing cells to divide in culture before collecting them for RNA-seq (85). The method used in that study kept cells naïve to critical cell-signaling events. We were interested in preserving those fate-determining signaling events, so we collected cells based on fluorescence within 10 minutes of being disrupted from their native environment in the embryo.

Transcripts were considered “detected” if their RPKM value was above a threshold of 25. All fold change calculations were done on adjusted RPKM values — raw RPKM values with 25



added to them — to avoid enriching for small differences between samples with low RPKM values.

Among 57 replicates of 9 samples from the 100 cell stage, we detected transcripts from 7,998 genes (above a threshold of 25 reads per kilobase of transcript per million mapped reads, or RPKM). This value roughly matched our expectations based on transcriptomes generated from earlier cell types — in our previous study we detected 8,575 genes amongst 1- to 16-cell stage embryos. In the previous study we thoroughly validated our low-input RNA-seq data by (1) comparing them to previously known gene expression patterns and (2) comparing them to single molecule fluorescent *in situ* hybridization assays (17). The sequencing technology used in this study was virtually identical, with the main difference being that the samples collected were from groups of smaller cells later in development, rather than single larger cells earlier in development. To validate the dataset in the present study, we compared our mRNA sequencing data to protein level data for the Cxa (C-out) and Cxp (C-in) samples, as previously reported (86). We used the EPIC database (<https://epic.gs.washington.edu/>) from Murray et al. 2012 to identify proteins that are differentially expressed between Cxa cells and Cxp cells (e.g. *elt-1*, *nhr-171*, and *vab-7*, Supplementary Fig. 2), and inspected our transcriptome data for matching trends. We chose these samples because they were the most technically difficult dissections, due to the cells' small size and low fluorescence levels, and hence were the samples we had the least confidence in.

Families of proteins were defined by creating groups of genes based on similarity, using a protein BLAST E-value cutoff of  $e^{-15}$ .

## Analysis of Slippage

Slippage is defined as the difference in velocity between myosin particles and the adjacent membrane (13). These rates are measured along the centripetal vectors, which we refer to as “Spyderlegs” in our code. To reduce noise from brownian motion or other non-myosin movement we used a filter to remove flow vectors moving slower than 1.5  $\mu\text{m}/\text{min}$  which is slightly slower than reported myosin velocities in these cells (13). This filter is adjustable in the pipeline so it can be tailored for use in other systems. The cell centroid (blue dots in Fig. 4D) was initially seeded manually and then automatically determined for each subsequent frame. In cases where the myosin flow was coalescing on an off-center point, the automatically determined center was manually overridden. A slippage rate of 0 means that both membrane and myosin are moving in concert with each other, while a positive slippage rate signifies that the myosin velocity is higher than the adjacent membrane. The values obtained from this semi-automated image analysis pipeline were then binned into two categories, early and late, relative to the birth of the neighboring MSxx cells. Early stages were defined as being between 3 and 7 minutes post MSxx birth, while late stages were 13 minutes post MSxx birth and later. Slippage rates were then plotted using Superplots [<https://huygens.science.uva.nl/SuperPlotsOfData/>, (59)].

The semi-automated analysis pipeline described in the Results determines the slippage rate over time for each centripetal vector (Spyderleg) as well as individual cell (Ea and Ep) averages and can be completed in about 30-45 minutes per embryo. While there is still room for further automation, the presented analysis pipeline is an important step toward making the required analyses feasible on a large scale, while still offering users the possibility to override erroneous automated decisions.

## Availability of Data and Materials

*C. elegans* strains generated in this study will be deposited to the *Caenorhabditis Genetics Center*. An interactive online visualization of transcriptomic data is available at <https://n2t.net/ark:/84478/d/2bbpmsq3>. RNA-seq reads, alignments, and RPKM files are available on NCBI GEO accession number GSE205061. A Jupyter Notebook with the code for the image analysis is available on GitHub (<https://github.com/mangalp/BobSeq>). Plasmids and other reagents will be made available upon request.

### **Acknowledgements**

We thank members of the Goldstein lab, Jeff Hardin, Minna Roh-Johnson, and Mark Peifer for comments and helpful discussions. Some strains were provided by the *Caenorhabditis Genetics Center* (CGC; [cbs.umn.edu/cgc/home](http://cbs.umn.edu/cgc/home)), which is funded by NIH Office of Research Infrastructure Programs (P40 OD010440), and the National BioResource Project (NBRP; <http://www.shigen.nig.ac.jp/c.elegans>).

### **Funding**

This work was supported by NIH MIRA R35GM134838 to BG and NIH F32GM119348 to MMS.

## **References**

1. Lecuit T, Lenne PF, Munro E. Force Generation, Transmission, and Integration during Cell and Tissue Morphogenesis. *Annu Rev Cell Dev Biol.* 2011 Nov;27(1):157–84.
2. Sawyer JM, Harrell JR, Shemer G, Sullivan-Brown J, Roh-Johnson M, Goldstein B. Apical constriction: a cell shape change that can drive morphogenesis. *Dev Biol.* 2010 May;341(1):5–19.
3. Nikolopoulou E, Galea GL, Rolo A, Greene NDE, Copp AJ. Neural tube closure: cellular, molecular and biomechanical mechanisms. *Dev Camb Engl.* 2017 Feb 15;144(4):552–66.
4. Wallingford JB, Niswander LA, Shaw GM, Finnell RH. The continuing challenge of understanding, preventing, and treating neural tube defects. *Science.* 2013 Mar 1;339(6123):1222002.
5. Martin AC, Goldstein B. Apical constriction: themes and variations on a cellular mechanism driving morphogenesis. *Development.* 2014 May;141(10):1987–98.
6. Hunter MV, Fernandez-Gonzalez R. Coordinating cell movements in vivo: junctional and cytoskeletal dynamics lead the way. *Curr Opin Cell Biol.* 2017 Oct;48:54–62.
7. Clarke DN, Martin AC. Roles of the Actin Cytoskeleton and Cell Adhesion in Tissue Morphogenesis. *Curr Biol CB.* 2021 May 24;31(10):R667–80.
8. Perez-Vale KZ, Peifer M. Orchestrating morphogenesis: building the body plan by cell shape changes and movements. *Dev Camb Engl.* 2020 Sep 11;147(17):dev191049.
9. Vuong-Brender TTK, Yang X, Labouesse M. *C. elegans* Embryonic Morphogenesis. *Curr Top Dev Biol.* 2016;116:597–616.
10. Nance J, Munro EM, Priess JR. *C. elegans* PAR-3 and PAR-6 are required for apicobasal asymmetries associated with cell adhesion and gastrulation. *Dev Camb Engl.* 2003 Nov;130(22):5339–50.

11. Lee JY, Goldstein B. Mechanisms of cell positioning during *C. elegans* gastrulation. *Dev Camb Engl*. 2003 Jan;130(2):307–20.
12. Goldstein B, Nance J. *Caenorhabditis elegans* Gastrulation: A Model for Understanding How Cells Polarize, Change Shape, and Journey Toward the Center of an Embryo. *Genetics*. 2020 Feb;214(2):265–77.
13. Roh-Johnson M, Shemer G, Higgins CD, McClellan JH, Werts AD, Tulu US, et al. Triggering a Cell Shape Change by Exploiting Preexisting Actomyosin Contractions. *Science*. 2012 Mar 9;335(6073):1232–5.
14. Bertocchi C, Wang Y, Ravasio A, Hara Y, Wu Y, Sailov T, et al. Nanoscale architecture of cadherin-based cell adhesions. *Nat Cell Biol*. 2017 Jan;19(1):28–37.
15. Marston DJ, Higgins CD, Peters KA, Cupp TD, Dickinson DJ, Pani AM, et al. MRCK-1 Drives Apical Constriction in *C. elegans* by Linking Developmental Patterning to Force Generation. *Curr Biol*. 2016 Aug;26(16):2079–89.
16. Buckley CD, Tan J, Anderson KL, Hanein D, Volkmann N, Weis WI, et al. Cell adhesion. The minimal cadherin-catenin complex binds to actin filaments under force. *Science*. 2014 Oct 31;346(6209):1254–211.
17. Tintori SC, Osborne Nishimura E, Golden P, Lieb JD, Goldstein B. A Transcriptional Lineage of the Early *C. elegans* Embryo. *Dev Cell*. 2016 Aug 22;38(4):430–44.
18. Powell-Coffman JA, Knight J, Wood WB. Onset of *C. elegans* gastrulation is blocked by inhibition of embryonic transcription with an RNA polymerase antisense RNA. *Dev Biol*. 1996 Sep 15;178(2):472–83.
19. Ahringer J. Reverse genetics [Internet]. *WormBook: The Online Review of C. elegans Biology* [Internet]. *WormBook*; 2006 [cited 2022 Jun 1]. Available from: <https://www.ncbi.nlm.nih.gov/books/NBK19711/>
20. Mandai K, Nakanishi H, Satoh A, Obaishi H, Wada M, Nishioka H, et al. Afadin: A novel actin filament-binding protein with one PDZ domain localized at cadherin-based

- cell-to-cell adherens junction. *J Cell Biol.* 1997 Oct 20;139(2):517–28.
21. Sawyer JK, Choi W, Jung KC, He L, Harris NJ, Peifer M. A contractile actomyosin network linked to adherens junctions by Canoe/afadin helps drive convergent extension. *Mol Biol Cell.* 2011 Jul;22(14):2491–508.
  22. Sakakibara S, Maruo T, Miyata M, Mizutani K, Takai Y. Requirement of the F-actin-binding activity of I-afadin for enhancing the formation of adherens and tight junctions. *Genes Cells Devoted Mol Cell Mech.* 2018 Feb;23(3):185–99.
  23. Smith MA, Blankman E, Gardel ML, Luettjohann L, Waterman CM, Beckerle MC. A zyxin-mediated mechanism for actin stress fiber maintenance and repair. *Dev Cell.* 2010 Sep 14;19(3):365–76.
  24. Dawes-Hoang RE, Parmar KM, Christiansen AE, Phelps CB, Brand AH, Wieschaus EF. folded gastrulation, cell shape change and the control of myosin localization. *Dev Camb Engl.* 2005 Sep;132(18):4165–78.
  25. Sawyer JK, Harris NJ, Slep KC, Gaul U, Peifer M. The *Drosophila* afadin homologue Canoe regulates linkage of the actin cytoskeleton to adherens junctions during apical constriction. *J Cell Biol* [Internet]. 2009 Jul 13 [cited 2022 Jun 1];186(1). Available from: <https://pubmed.ncbi.nlm.nih.gov/19596848/>
  26. Lee AY, Perreault R, Harel S, Boulier EL, Suderman M, Hallett M, et al. Searching for Signaling Balance through the Identification of Genetic Interactors of the Rab Guanine-Nucleotide Dissociation Inhibitor gdi-1. *PLOS ONE.* 2010 May 13;5(5):e10624.
  27. Ooshio T, Fujita N, Yamada A, Sato T, Kitagawa Y, Okamoto R, et al. Cooperative roles of Par-3 and afadin in the formation of adherens and tight junctions. *J Cell Sci.* 2007 Jul 15;120(Pt 14):2352–65.
  28. Lynch AM, Grana T, Cox-Paulson E, Couthier A, Cameron M, Chin-Sang I, et al. A Genome-wide Functional Screen Shows MAGI-1 Is an L1CAM-Dependent Stabilizer of Apical Junctions in *C. elegans*. *Curr Biol.* 2012 Oct 23;22(20):1891–9.

29. Elloul S, Kedrin D, Knoblauch NW, Beck AH, Toker A. The adherens junction protein afadin is an AKT substrate that regulates breast cancer cell migration. *Mol Cancer Res MCR*. 2014 Mar;12(3):464–76.
30. Manning LA, Perez-Vale KZ, Schaefer KN, Sewell MT, Peifer M. The *Drosophila* Afadin and ZO-1 homologues Canoe and Polychaetoid act in parallel to maintain epithelial integrity when challenged by adherens junction remodeling. *Mol Biol Cell*. 2019 Jul 22;30(16):1938–60.
31. Yu HH, Zallen JA. Abl and Canoe/Afadin mediate mechanotransduction at tricellular junctions. *Science*. 2020 Nov 27;370(6520):eaba5528.
32. Grana TM, Cox EA, Lynch AM, Hardin J. SAX-7/L1CAM and HMR-1/cadherin function redundantly in blastomere compaction and non-muscle myosin accumulation during *Caenorhabditis elegans* gastrulation. *Dev Biol*. 2010 Aug 15;344(2):731–44.
33. Callaci S, Morrison K, Shao X, Schuh AL, Wang Y, Yates JR, et al. Phosphoregulation of the *C. elegans* cadherin–catenin complex. *Biochem J*. 2015 Dec 15;472(3):339–52.
34. Pokutta S, Drees F, Takai Y, Nelson WJ, Weis WI. Biochemical and Structural Definition of the I-Afadin- and Actin-binding Sites of  $\alpha$ -Catenin. *J Biol Chem*. 2002 May 24;277(21):18868–74.
35. Sakakibara S, Mizutani K, Sugiura A, Sakane A, Sasaki T, Yonemura S, et al. Afadin regulates actomyosin organization through  $\alpha$ E-catenin at adherens junctions. *J Cell Biol*. 2020 May 4;219(5):e201907079.
36. Harrell JR, Goldstein B. Internalization of multiple cells during *C. elegans* gastrulation depends on common cytoskeletal mechanisms but different cell polarity and cell fate regulators. *Dev Biol*. 2011 Feb 1;350(1):1–12.
37. Alberga A, Boulay JL, Kempe E, Dennefeld C, Haenlin M. The snail gene required for mesoderm formation in *Drosophila* is expressed dynamically in derivatives of all three

- germ layers. *Dev Camb Engl.* 1991 Apr;111(4):983–92.
38. Carver EA, Jiang R, Lan Y, Oram KF, Gridley T. The mouse snail gene encodes a key regulator of the epithelial-mesenchymal transition. *Mol Cell Biol.* 2001 Dec;21(23):8184–8.
39. Nieto MA. The snail superfamily of zinc-finger transcription factors. *Nat Rev Mol Cell Biol.* 2002 Mar;3(3):155–66.
40. Zheng H, Shen M, Zha YL, Li W, Wei Y, Blanco MA, et al. PKD1 phosphorylation-dependent degradation of SNAIL by SCF-FBXO11 regulates epithelial-mesenchymal transition and metastasis. *Cancer Cell.* 2014 Sep 8;26(3):358–73.
41. Tintori SC, Golden P, Goldstein B. Differential Expression Gene Explorer (DrEdGE): a tool for generating interactive online visualizations of gene expression datasets. *Bioinformatics.* 2020 Apr 15;36(8):2581–3.
42. Sulston JE, Schierenberg E, White JG, Thomson JN. The embryonic cell lineage of the nematode *Caenorhabditis elegans*. *Dev Biol.* 1983 Nov;100(1):64–119.
43. Lecroisey C, Brouilly N, Qadota H, Mariol MC, Rochette NC, Martin E, et al. ZYX-1, the unique zyxin protein of *Caenorhabditis elegans*, is involved in dystrophin-dependent muscle degeneration. *Mol Biol Cell.* 2013 Apr;24(8):1232–49.
44. Kadrmas JL, Beckerle MC. The LIM domain: from the cytoskeleton to the nucleus. *Nat Rev Mol Cell Biol.* 2004 Nov;5(11):920–31.
45. Qadota H, Mercer KB, Miller RK, Kaibuchi K, Benian GM. Two LIM domain proteins and UNC-96 link UNC-97/pinch to myosin thick filaments in *Caenorhabditis elegans* muscle. *Mol Biol Cell.* 2007 Nov;18(11):4317–26.
46. Warner A, Qadota H, Benian GM, Vogl AW, Moerman DG. The *Caenorhabditis elegans* paxillin orthologue, PXL-1, is required for pharyngeal muscle contraction and for viability. *Mol Biol Cell.* 2011 Jul 7;22(14):2551.



47. Cattaruzza M, Lattrich C, Hecker M. Focal adhesion protein zyxin is a mechanosensitive modulator of gene expression in vascular smooth muscle cells. *Hypertens Dallas Tex* 1979. 2004 Apr;43(4):726–30.
48. Hoffman BD, Grashoff C, Schwartz MA. Dynamic molecular processes mediate cellular mechanotransduction. *Nature*. 2011 Jul 20;475(7356):316–23.
49. Nix DA, Beckerle MC. Nuclear-cytoplasmic shuttling of the focal contact protein, zyxin: a potential mechanism for communication between sites of cell adhesion and the nucleus. *J Cell Biol*. 1997 Sep 8;138(5):1139–47.
50. Wu M, Herman MA. A novel noncanonical Wnt pathway is involved in the regulation of the asymmetric B cell division in *C. elegans*. *Dev Biol*. 2006 May 15;293(2):316–29.
51. Castaneda PG, Wu N, Qiu Z, Lee M, Cram EJ. ZYX-1/Zyxin plays a minor role in oocyte transit through the spermatheca in *C. elegans*. *MicroPublication Biol*. 2021;10.17912/micropub.biology.000489.
52. Dickinson DJ, Pani AM, Heppert JK, Higgins CD, Goldstein B. Streamlined Genome Engineering with a Self-Excising Drug Selection Cassette. *Genetics*. 2015 Aug;200(4):1035–49.
53. Bindels D, Haarbosch L, van Weeren L, Postma M, Wiese K, M M, et al. mScarlet: a bright monomeric red fluorescent protein for cellular imaging. *Nat Methods* [Internet]. 2017 Jan [cited 2022 Jun 1];14(1). Available from: <https://pubmed.ncbi.nlm.nih.gov/27869816/>
54. Arzt M, Deschamps J, Schmied C, Pietzsch T, Schmidt D, Tomancak P, et al. LABKIT: Labeling and Segmentation Toolkit for Big Image Data. *Front Comput Sci* [Internet]. 2022 [cited 2022 Jun 3];4. Available from: <https://www.frontiersin.org/article/10.3389/fcomp.2022.777728>
55. Krull A, Vičar T, Prakash M, Lalit M, Jug F. Probabilistic Noise2Void: Unsupervised Content-Aware Denoising. *Front Comput Sci* [Internet]. 2020 [cited 2022 Jun 1];2.

Available from: <https://www.frontiersin.org/article/10.3389/fcomp.2020.00005>

56. Farnebäck G. Two-Frame Motion Estimation Based on Polynomial Expansion. In: Bigun J, Gustavsson T, editors. *Image Analysis*. Berlin, Heidelberg: Springer; 2003. p. 363–70. (Lecture Notes in Computer Science).
57. Bradski G. The openCV library. Dr Dobbs J Softw Tools Prof Program. 2000;25(11):120–3.
58. Lord SJ, Velle KB, Mullins RD, Fritz-Laylin LK. SuperPlots: Communicating reproducibility and variability in cell biology. *J Cell Biol*. 2020 Jun 1;219(6):e202001064.
59. Goedhart J. SuperPlotsOfData-a web app for the transparent display and quantitative comparison of continuous data from different conditions. *Mol Biol Cell*. 2021 Mar 15;32(6):470–4.
60. Choi W, Harris NJ, Sumigray KD, Peifer M. Rap1 and Canoe/afadin are essential for establishment of apical–basal polarity in the *Drosophila* embryo. *Mol Biol Cell*. 2013 Apr 1;24(7):945–63.
61. Takai Y, Nakanishi H. Nectin and afadin: novel organizers of intercellular junctions. *J Cell Sci*. 2003 Jan 1;116(Pt 1):17–27.
62. Perez-Vale KZ, Yow KD, Johnson RI, Byrnes AE, Finegan TM, Slep KC, et al. Multivalent interactions make adherens junction–cytoskeletal linkage robust during morphogenesis. *J Cell Biol*. 2021 Nov 11;220(12):e202104087.
63. Fernandez-Gonzalez R, Peifer M. Powering morphogenesis: multiscale challenges at the interface of cell adhesion and the cytoskeleton. *Mol Biol Cell*. 2022 Jul;33(8):pe4.
64. Anderson CA, Kovar DR, Gardel ML, Winkelman JD. LIM domain proteins in cell mechanobiology. *Cytoskeleton*. 2021;78(6):303–11.
65. Winkelman JD, Anderson CA, Suarez C, Kovar DR, Gardel ML. Evolutionarily diverse LIM domain-containing proteins bind stressed actin filaments through a conserved mechanism. *Proc Natl Acad Sci U S A*. 2020 Oct 13;117(41):25532–42.

66. Matsuda M, Chu CW, Sokol SY. Lmo7 recruits myosin II heavy chain to regulate actomyosin contractility and apical domain size in *Xenopus* ectoderm. *Dev Camb Engl*. 2022 May 15;149(10):dev200236.
67. Beati H, Peek I, Hordowska P, Honemann-Capito M, Glashauser J, Renschler FA, et al. The adherens junction-associated LIM domain protein Smallish regulates epithelial morphogenesis. *J Cell Biol*. 2018 Mar 5;217(3):1079–95.
68. Newman SA. Generic physical mechanisms of tissue morphogenesis: A common basis for development and evolution. *J Evol Biol*. 1994;7(4):467–88.
69. Wieschaus E. From molecular patterns to morphogenesis: The lessons from *Drosophila*. *Nobel Lect*. 1995;8:314–26.
70. Chisholm AD, Hardin J. Epidermal morphogenesis. *WormBook Online Rev C Elegans Biol*. 2005 Dec 1;1–22.
71. Chu CW, Xiang B, Ossipova O, Ioannou A, Sokol SY. The Ajuba family protein Wtip regulates actomyosin contractility during vertebrate neural tube closure. *J Cell Sci*. 2018 May 16;131(10):jcs213884.
72. Marie H, Pratt SJ, Betson M, Epple H, Kittler JT, Meek L, et al. The LIM protein Ajuba is recruited to cadherin-dependent cell junctions through an association with alpha-catenin. *J Biol Chem*. 2003 Jan 10;278(2):1220–8.
73. Nola S, Daigaku R, Smolarczyk K, Carstens M, Martin-Martin B, Longmore G, et al. Ajuba is required for Rac activation and maintenance of E-cadherin adhesion. *J Cell Biol*. 2011 Nov 28;195(5):855–71.
74. Razzell W, Bustillo ME, Zallen JA. The force-sensitive protein Ajuba regulates cell adhesion during epithelial morphogenesis. *J Cell Biol*. 2018 Oct 1;217(10):3715–30.
75. Brenner S. The Genetics of *CAENORHABDITIS ELEGANS*. *Genetics*. 1974 May;77(1):71–94.
76. Zanin E, Dumont J, Gassmann R, Cheeseman I, Maddox P, Bahmanyar S, et al.

Affinity Purification of Protein Complexes in *C. elegans*. *Methods Cell Biol.*

2011;106:289–322.

77. Gottschalk A, Almedom RB, Schedletzky T, Anderson SD, Yates JR, Schafer WR. Identification and characterization of novel nicotinic receptor-associated proteins in *Caenorhabditis elegans*. *EMBO J.* 2005 Jul 20;24(14):2566–78.
78. Schindelin J, Arganda-Carreras I, Frise E, Kaynig V, Longair M, Pietzsch T, et al. Fiji: an open-source platform for biological-image analysis. *Nat Methods.* 2012 Jul;9(7):676–82.
79. Dickinson DJ, Ward JD, Reiner DJ, Goldstein B. Engineering the *Caenorhabditis elegans* genome using Cas9-triggered homologous recombination. *Nat Methods.* 2013 Oct;10(10):1028–34.
80. Umeda K, Iwasawa N, Negishi M, Oinuma I. A short splicing isoform of afadin suppresses the cortical axon branching in a dominant-negative manner. *Mol Biol Cell.* 2015 May 15;26(10):1957–70.
81. Kurita S, Yamada T, Rikitsu E, Ikeda W, Takai Y. Binding between the junctional proteins afadin and PLEKHA7 and implication in the formation of adherens junction in epithelial cells. *J Biol Chem.* 2013 Oct 11;288(41):29356–68.
82. Gibson DG, Young L, Chuang RY, Venter JC, Hutchison CA, Smith HO. Enzymatic assembly of DNA molecules up to several hundred kilobases. *Nat Methods.* 2009 May;6(5):343–5.
83. Schwartz ML, Jorgensen EM. SapTrap, a Toolkit for High-Throughput CRISPR/Cas9 Gene Modification in *Caenorhabditis elegans*. *Genetics.* 2016 Apr;202(4):1277–88.
84. Baker SC, Bauer SR, Beyer RP, Brenton JD, Bromley B, Burrill J, et al. The External RNA Controls Consortium: a progress report. *Nat Methods.* 2005 Oct;2(10):731–4.
85. Hashimshony T, Feder M, Levin M, Hall BK, Yanai I. Spatiotemporal transcriptomics reveals the evolutionary history of the endoderm germ layer. *Nature.* 2015 Mar

12;519(7542):219–22.

86. Murray JI, Boyle TJ, Preston E, Vafeados D, Mericle B, Weisdepp P, et al.

Multidimensional regulation of gene expression in the *C. elegans* embryo. *Genome Res.*

2012 Jul;22(7):1282–94.

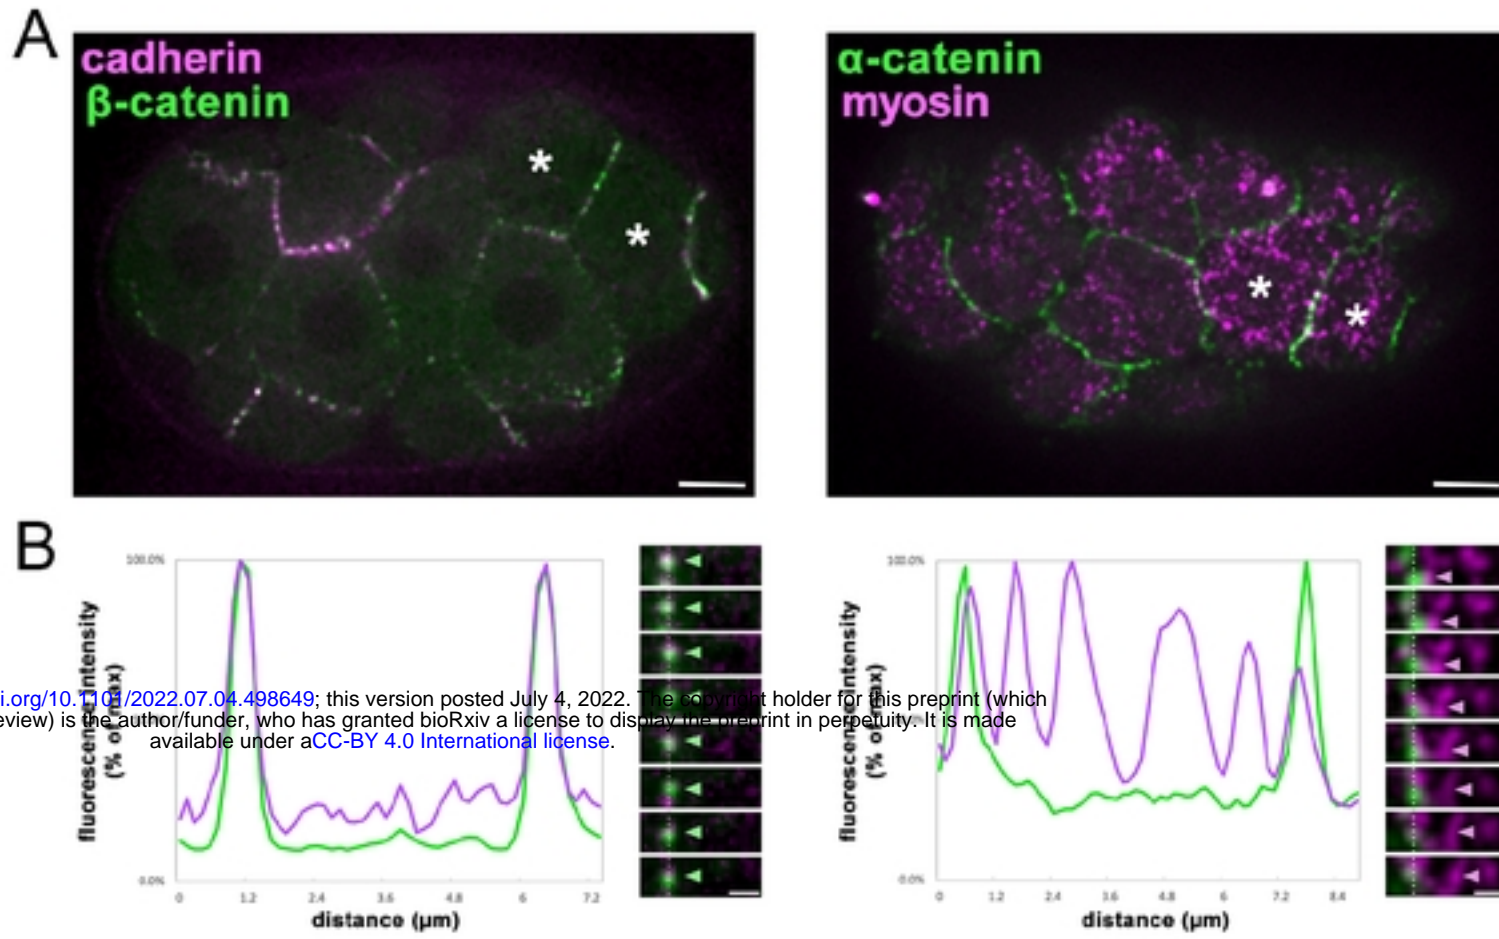

bioRxiv preprint doi: <https://doi.org/10.1101/2022.07.04.498649>; this version posted July 4, 2022. The copyright holder for this preprint (which was not certified by peer review) is the author/funder, who has granted bioRxiv a license to display the preprint in perpetuity. It is made available under aCC-BY 4.0 International license.

**Figure 1: All three CCC components remain associated with membrane borders during early stage actomyosin contractions.** (A) Two-color spinning disk confocal fluorescence images of HMR-1::mKate2 (cadherin) with GFP::HMP-2 ( $\beta$ -catenin), left, and HMP-1::GFP ( $\alpha$ -catenin) with NMY-2::mKate2 (myosin), right. Apically constricting cells are labeled (asterisks) (B) Representative line scans of the fluorescence intensities across the cell cortex from anterior (left) to posterior (right) with corresponding images of these junctions over time. As indicated by arrowheads,  $\beta$ -catenin (n=3) and  $\alpha$ -catenin (n=7) remained at junctions while myosin particles moved centripetally. (A) Scale Bar = 5  $\mu$ m (B) inset scale bar = 1  $\mu$ m, kymograph frames represent 3 second intervals.



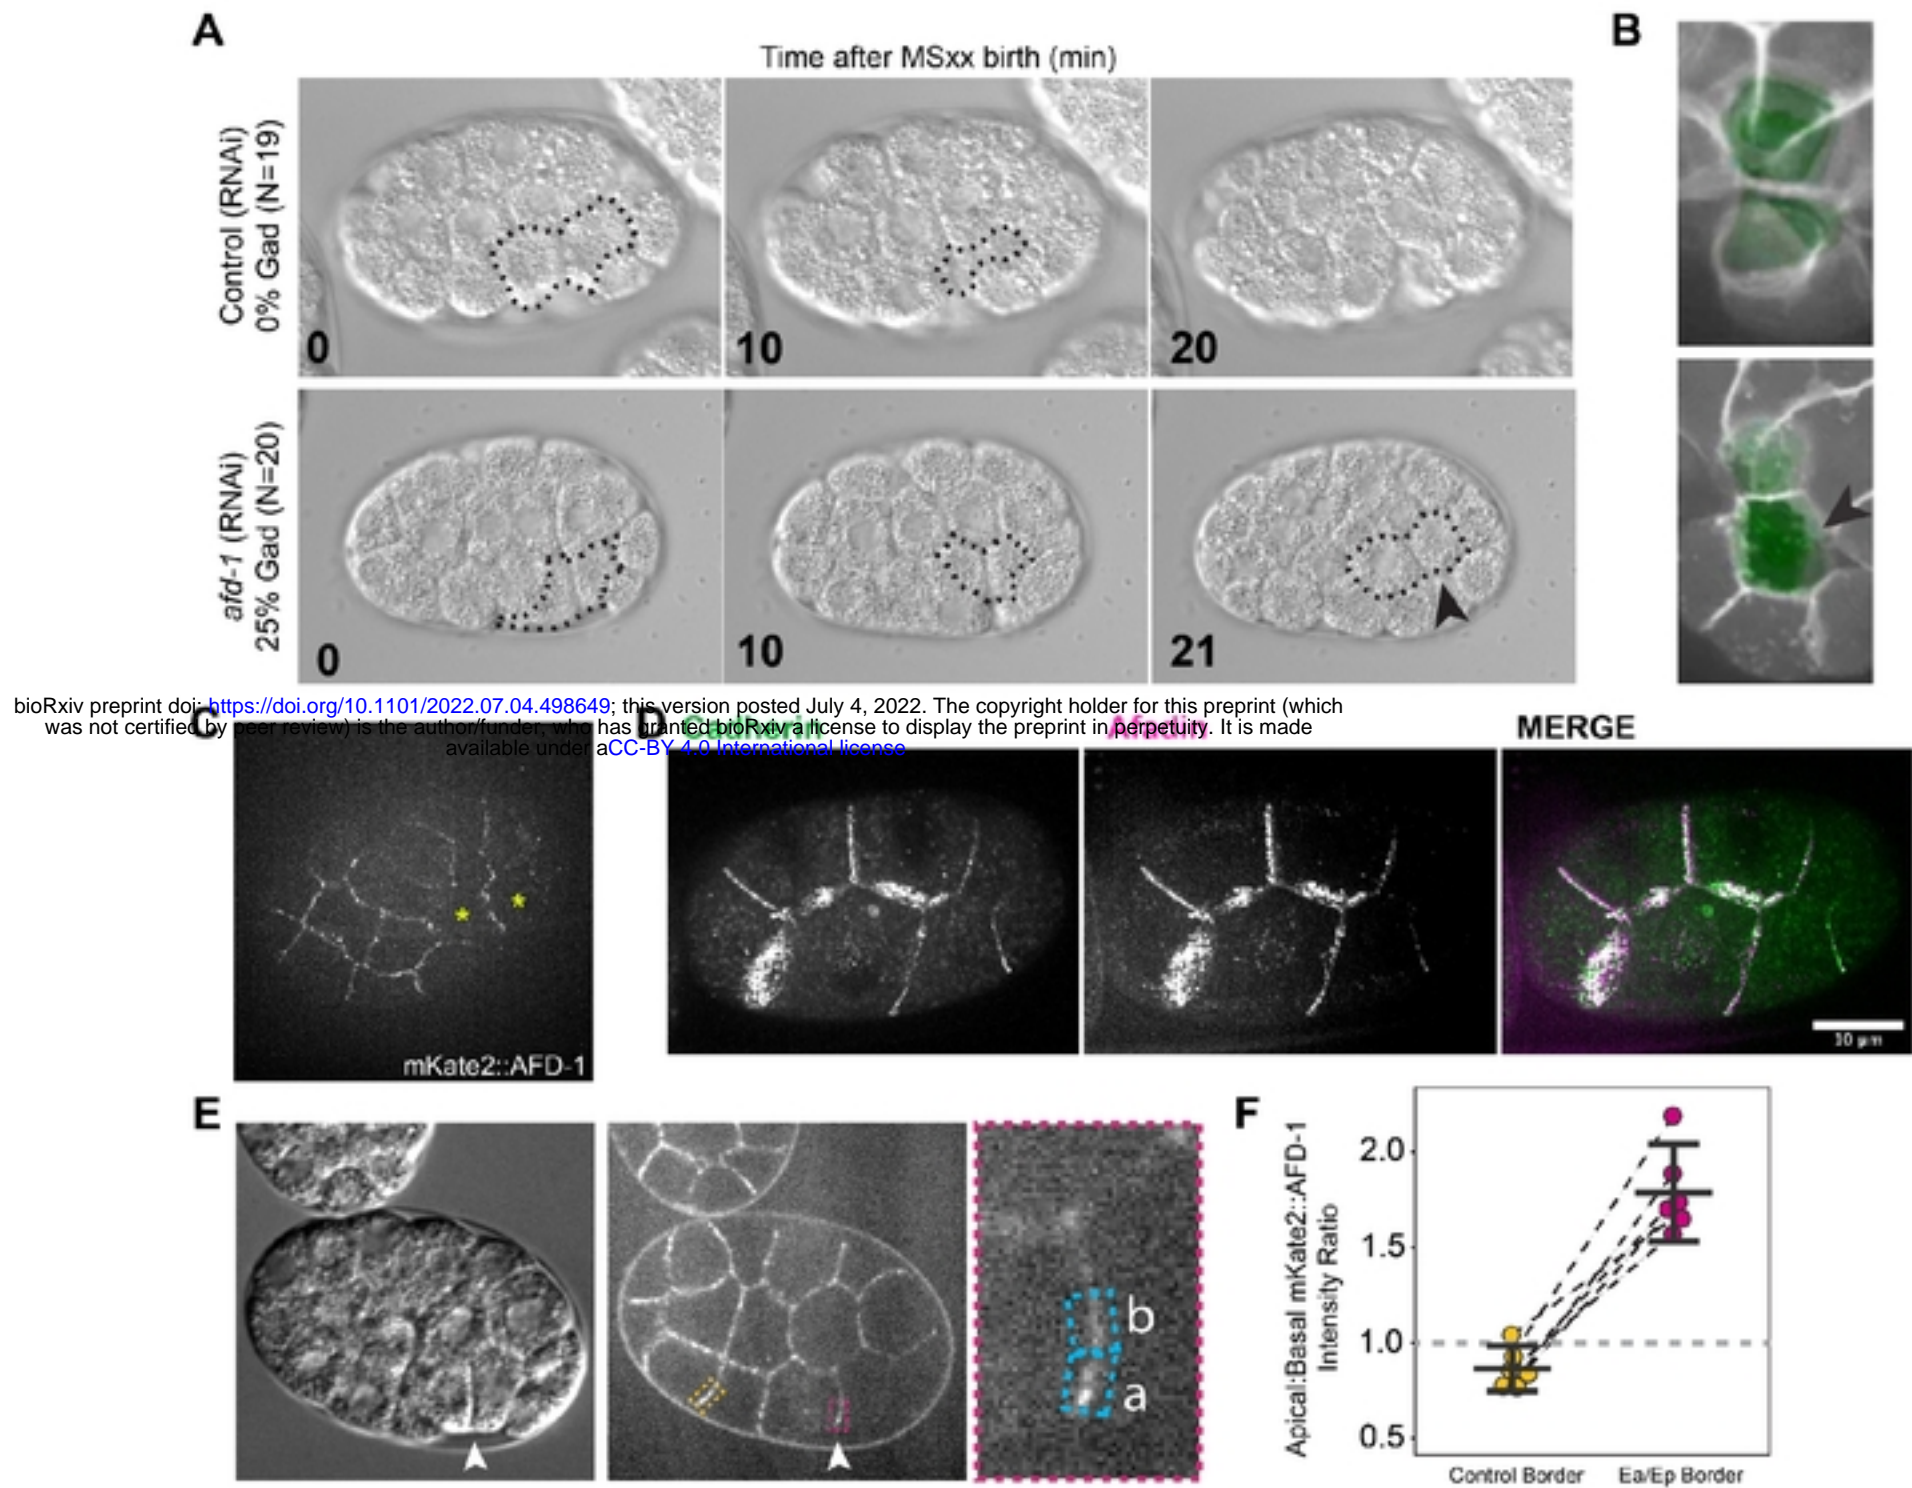

**Figure 2. Afdin contributes to gastrulation and localizes along with members of the CCC at cell junctions.** (A) DIC imaging of a near-lateral surface of *C. elegans* embryos around the start of gastrulation, from uninjected control mothers or those injected with dsRNA targeting *afd-1*. The surfaces of internalizing EPCs that were not covered by other cells in 3 dimensions are outlined (identified in multiplane videos; a single plane is shown), and the arrowhead points to these exposed EPC cell surfaces at the time of cell division, indicating a gastrulation defect that was not seen in the control embryos. (B) Z-projection of spinning-disk confocal sections at the apical surface of the embryo show membrane label mScarlet-I-PH (mSc-PH) in control (top) and *afd-1/afadin* RNAi (bottom) with the Ea/p surfaces pseudo-colored in green, as these cells

began to divide. The surface of Ep in the *afd-1/afadin* RNAi embryo remains exposed (black arrowhead). **(C)** Single spinning-disk confocal section near the surface of a ventrally-mounted embryo showing junctional localization of endogenously expressed mKate2::AFD-1 protein. Apically constricting cells are labeled with yellow asterisks. **(D)** Max-intensity projection of a 8-cell stage embryo with endogenously tagged HMR-1::GFP and mKate2::AFD-1 showing colocalization at junctions. **(E)** Single plane from a laterally mounted embryo showing that the border between apically constricting cells (arrowhead) has apically enriched mKate2::AFD-1 (magenta box) and enrichment that is less apically biased at a control border (yellow box), quantified in **(F)**. **(F)** Plot showing the ratio of Apical:Basal fluorescence intensities at the Ea/Ep border and control border. Mean values and 95% confidence intervals are shown, with dotted lines connecting pairs of measurements from each embryo ( $n = 6$ ,  $p = 0.0002$ ).

bioRxiv preprint doi: <https://doi.org/10.1101/2022.07.04.499049>; this version posted July 5, 2022. The copyright holder for this preprint (which was not certified by peer review) is the author/funder, who has granted bioRxiv a license to display the preprint in perpetuity. It is made available under aCC-BY 4.0 International license.



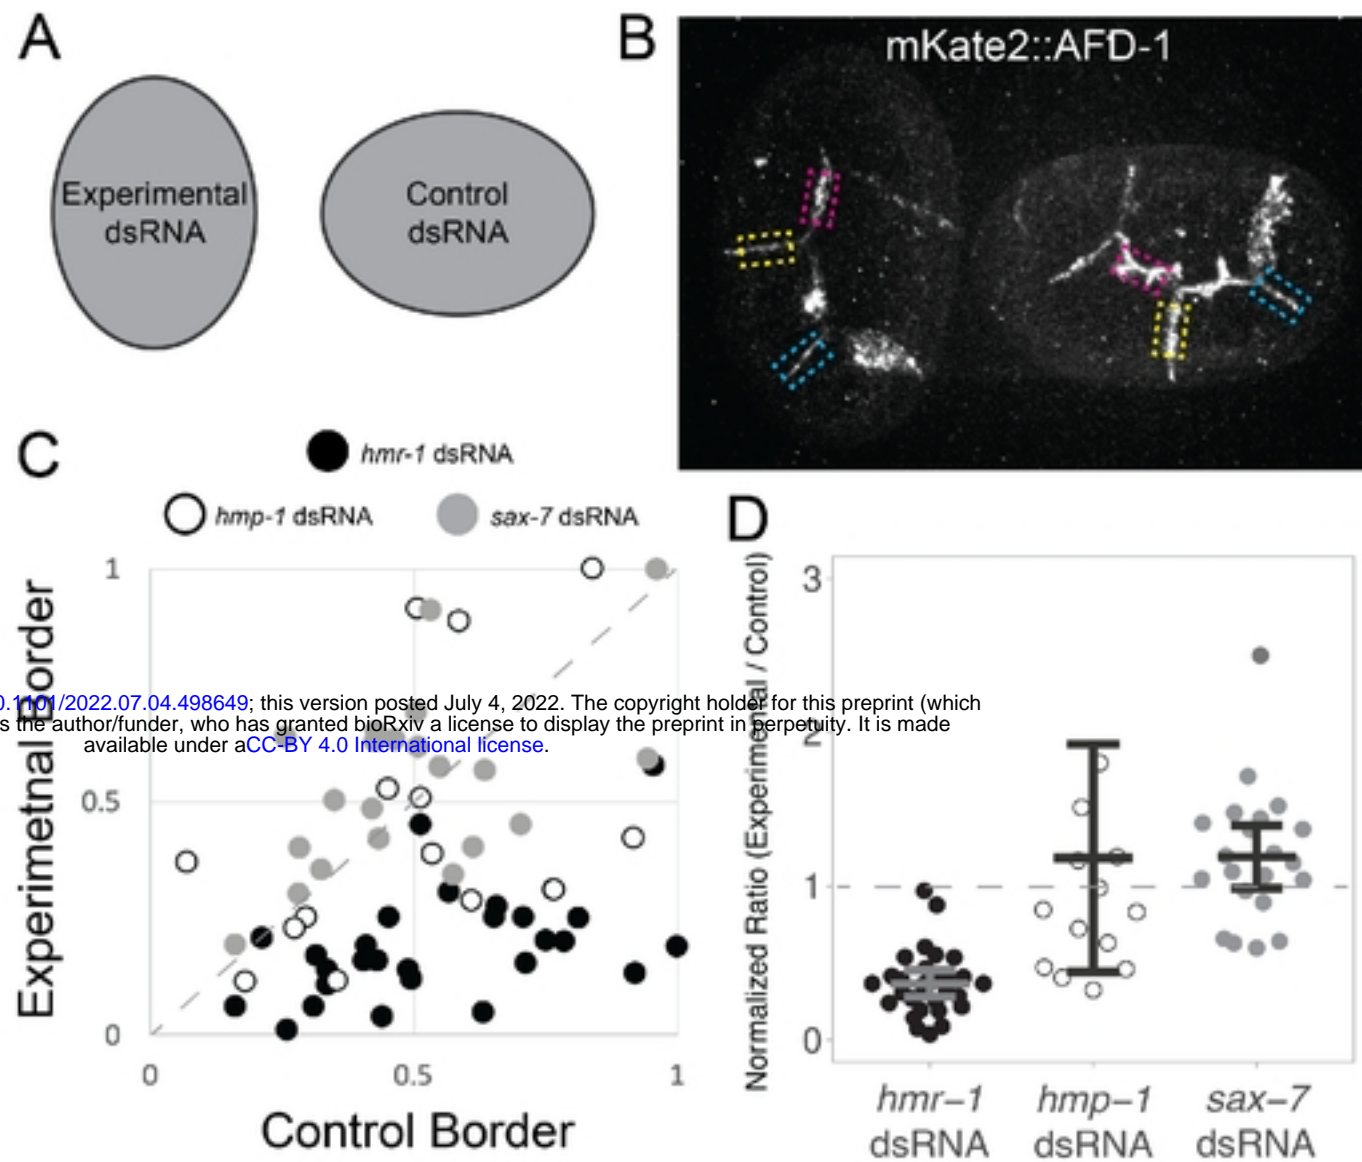

bioRxiv preprint doi: <https://doi.org/10.1101/2022.07.04.498649>; this version posted July 4, 2022. The copyright holder for this preprint (which was not certified by peer review) is the author/funder, who has granted bioRxiv a license to display the preprint in perpetuity. It is made available under aCC-BY 4.0 International license.

**Figure 3: AFD-1/afadin localization depends on *hmr-1* but not *hmp-1*.** (A) Embryos were mounted adjacent to one another oriented so that embryos from control and experimental dsRNA injected worms could be differentiated. (B) Embryos were paired by developmental stage, *hmr-1* RNAi vs. control RNAi shown here, and like junctions were analyzed between each pair of embryos (yellow, cyan, and magenta boxes indicate like junctions; yellow is an ABpl-ABal cell junction, magenta is an ABpl-MS cell junction, and blue is an ABal-ABar cell junction). (C) Plot of normalized fluorescence intensities for control vs. experimental borders in *hmr-1* RNAi (filled circles), *hmp-1* RNAi (open circles), and *sax-7* RNAi (gray circles). The dotted line along the diagonal indicates a 1:1 ratio. (D) Data from C plotted as normalized ratios (experimental/control levels) with individual measurements, means and 95% confidence intervals shown. *hmr-1* RNAi embryos had a lower level of mKate2::AFD-1 at junctions than both *hmp-1* RNAi ( $p = 0.0285$ ) and *sax-7* RNAi ( $p = 1 \times 10^{-8}$ ). A single outlier data point with a

value of 5.21 for the *hmp-1* dsRNA condition is not shown but was included in the statistical analysis.

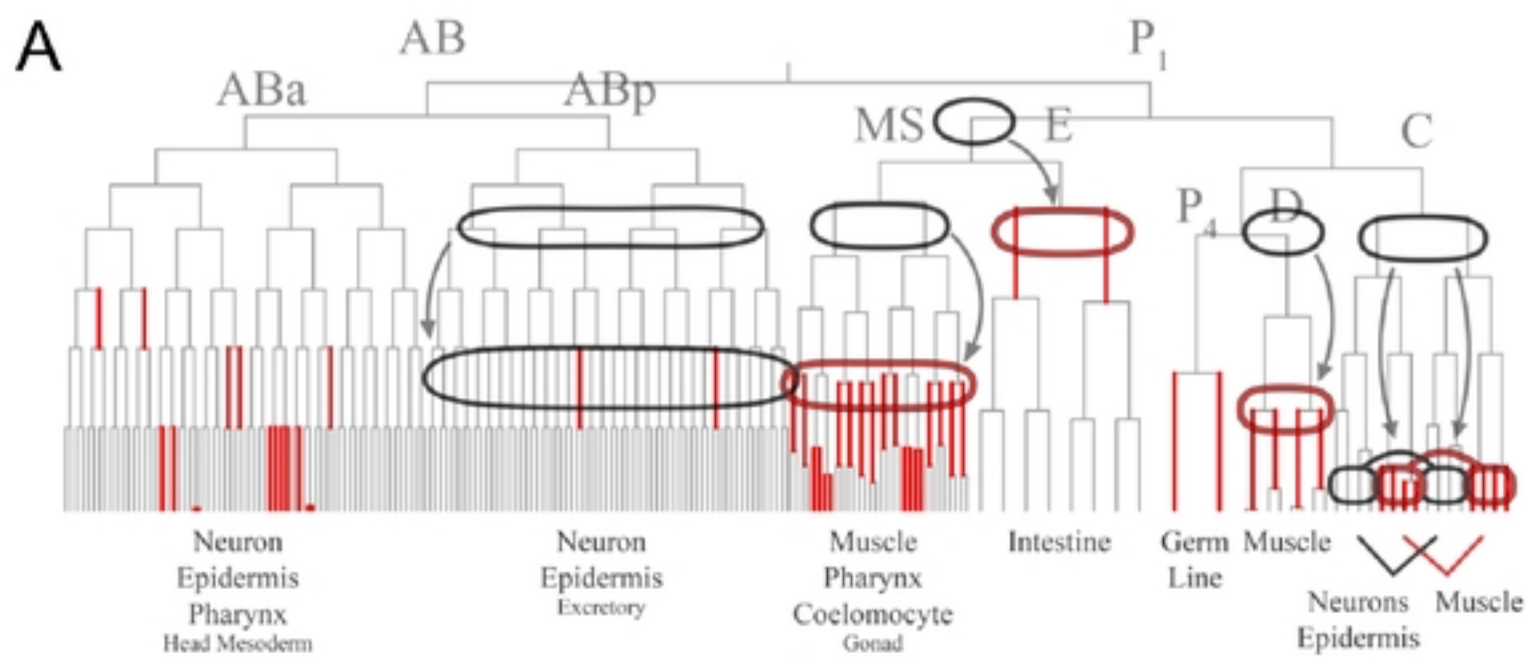

bioRxiv preprint doi: <https://doi.org/10.1101/2022.07.04.498649>; this version posted July 4, 2022. The copyright holder for this preprint (which was not certified by peer review) is the author/funder, who has granted bioRxiv a license to display the preprint in perpetuity. It is made available under aCC-BY 4.0 International license.

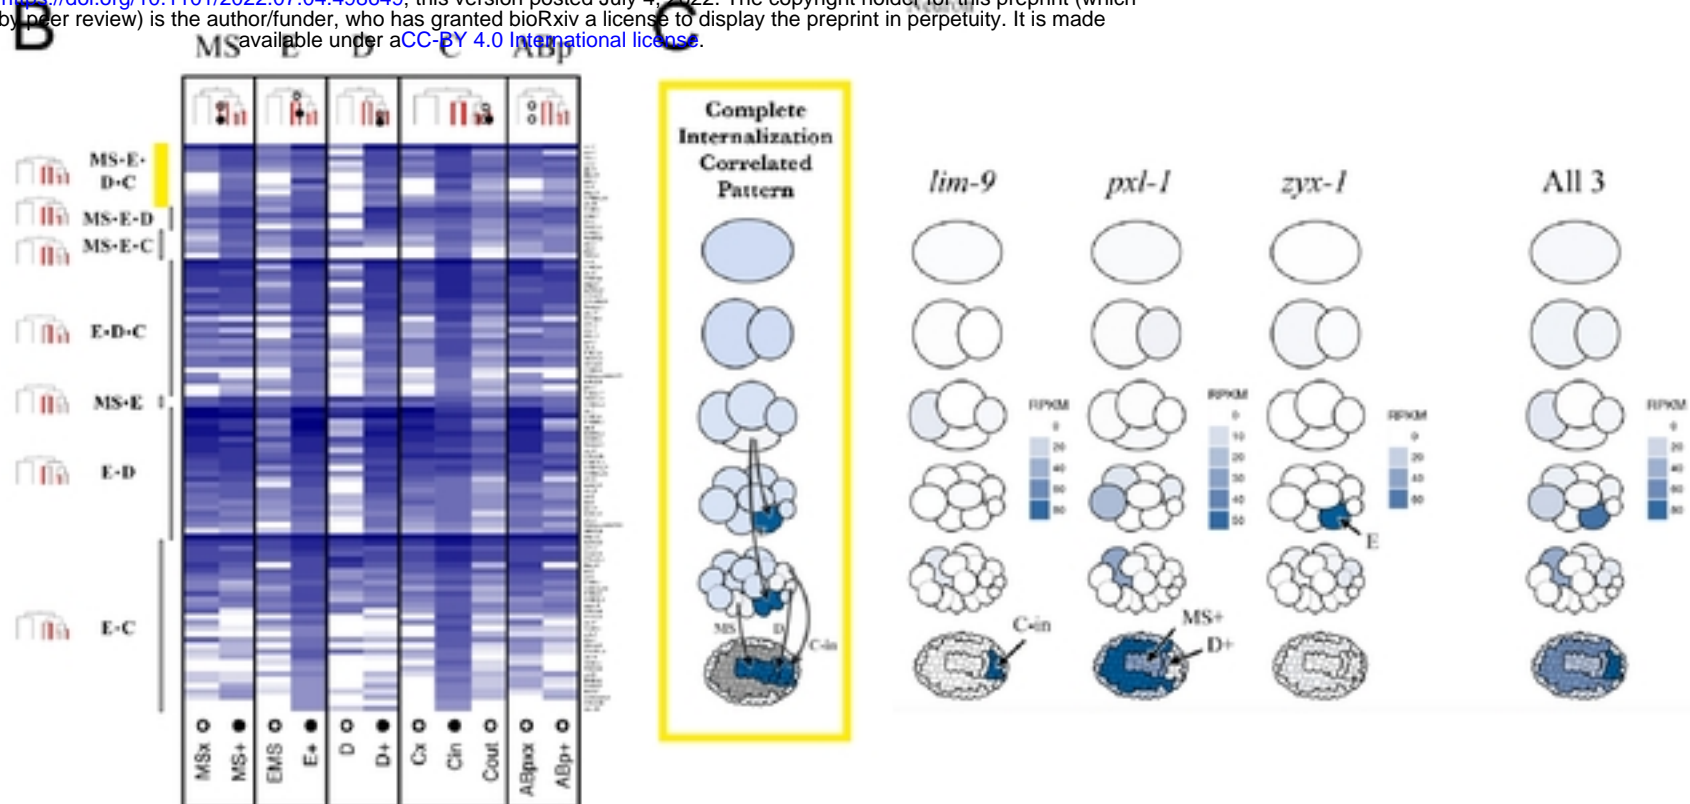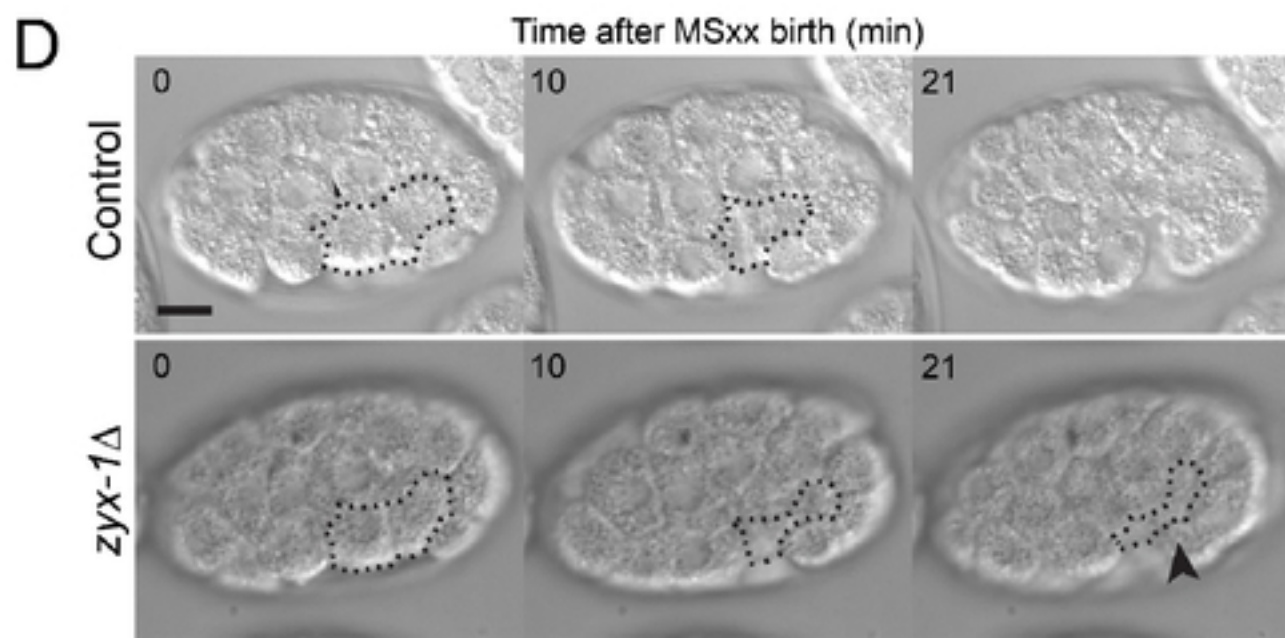

Figure 4. Transcriptome profiling of multiple divergent, gastrulating cell types reveals internalization-correlated expression pattern of LIM domain-containing gene family. (A) C.



*C. elegans* lineage map indicating the four internalizing lineages. All internalizing cells are represented with red branches. The internalizing MS, E, D, and Cxp lineages were dissected for transcriptome profiling and compared against two negative control lineages that do not internalize - the ABp and Cxa lineages. **(B)** Heatmap showing transcript abundance for the 99 internalization-correlated genes. Open circles indicate samples from a non-internalizing cell while closed circles indicate samples from an internalizing cell. **(C)** Pictograms of embryos representing relative gene expression levels of LIM domain-containing genes in the different internalizing cell lineages (key in Supplementary Fig. 3). A mockup of an idealized gene

bioRxiv preprint doi: <https://doi.org/10.1101/2022.07.01.499069>; this version posted July 6, 2022. The copyright holder for this preprint (which was not certified by peer review) is the author/funder, who has granted bioRxiv a license to display the preprint in perpetuity. It is made available under aCC-BY 4.0 International license.

expression pattern for a hypothesized master regulator of gastrulation is shown on the left. The combined gene expression of all three LIM domain-containing genes is shown on the right. **(D)** DIC imaging of *C. elegans* embryos around the start of gastrulation in control (N2) embryos and in *zyx-1Δ* (LP831) embryos. The surfaces of internalizing EPCs that were not covered by other cells in 3 dimensions are outlined, and the black arrowhead points to these exposed EPC cell surfaces at the time of cell division, indicating a gastrulation defect that is not seen in the control.

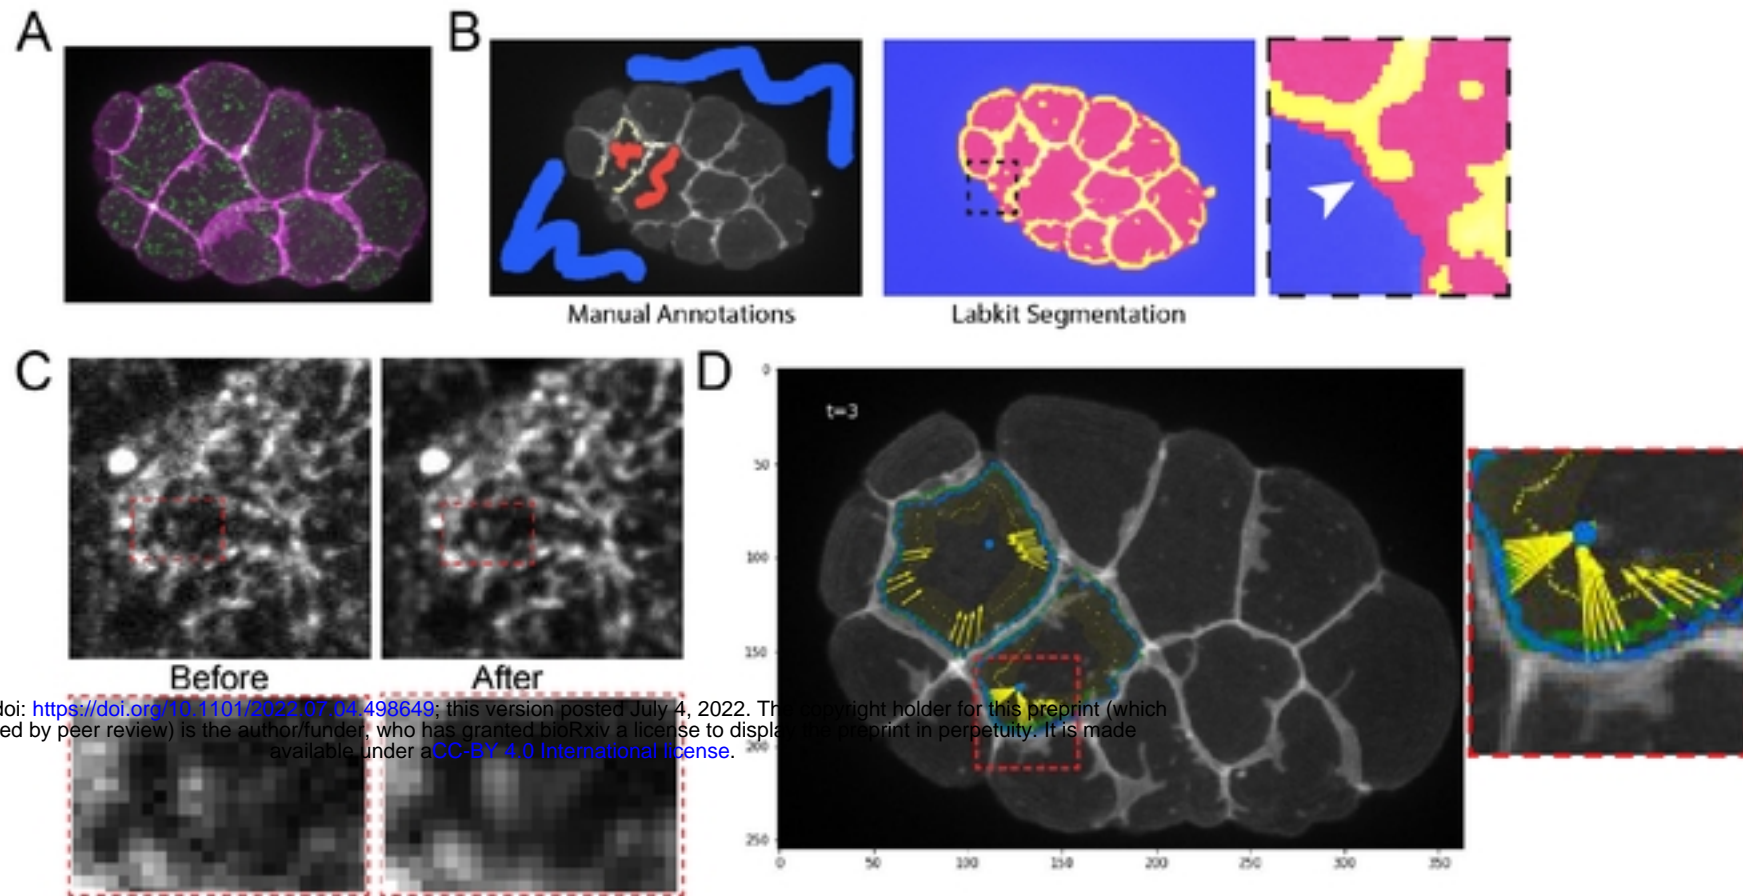

**Figure 5. Semi-automated workflow for analyzing actomyosin-membrane coupling.** (A)

Z-projection of spinning-disk confocal images of ventrally-mounted embryos with labeled membrane (mScarlet-I::PH) and myosin (mNG::NMY-2). (B) Cell segmentation using Labkit in Fiji trained with user defined annotations for background (blue), cell interior (red), and membrane borders (yellow) for 3 time points (beginning, middle, and end) (left). Labkit outputs (right) were manually corrected as needed (inset, white arrowhead, see methods). (C) Noise2Void was used to clean up the mNG::NMY-2 images to assist with the automatic flow detection. (D) Image showing membrane segmentation (green and blue outlines), centroid (blue dot) and centripetal vectors calculated from myosin flows (yellow arrows). The shaded yellow region indicates the 2  $\mu$ m border region mentioned in the main text.



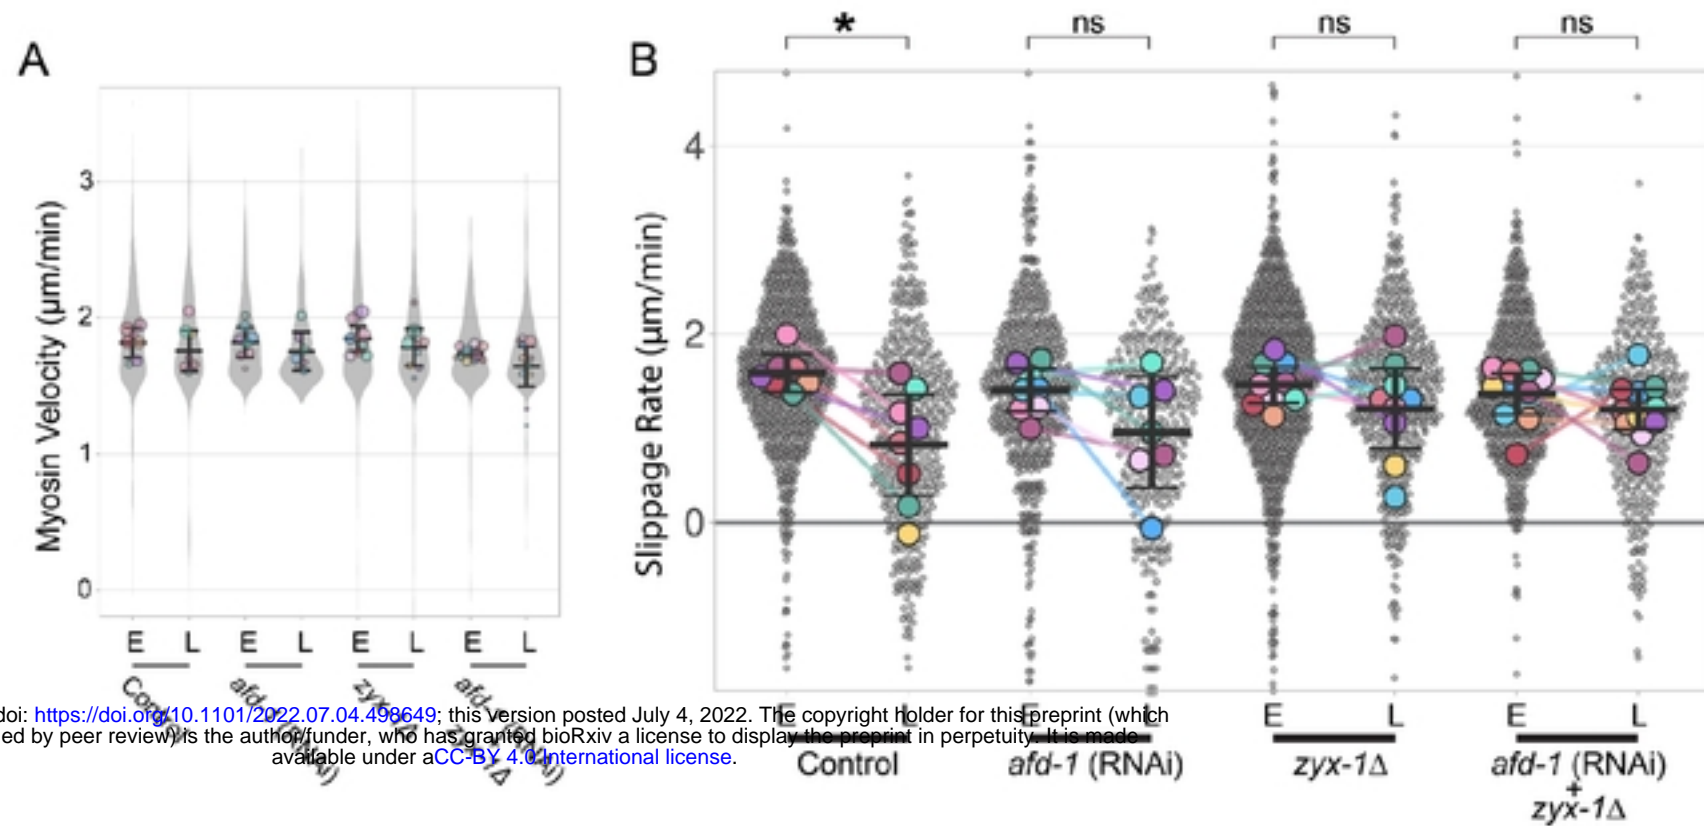

**Figure 6: *afd-1*/afadin and *zyx-1*/zyxin are required for proper myosin/membrane**

**movements during apical constriction. (A) Bulk measurements of myosin velocities along**

centripetal vectors at both early (E) and late (L) stages are similar across all conditions. No

pairwise comparison was significantly different between early and late stages for wild-type

(control) embryos or for any of the RNAi experiments. (B) Superplot (58,59) of calculated

slippage rates between myosin and membrane movement with individual centripetal vector

measurements displayed as small semi-transparent points. Mean data for each replicate shown

as a larger dot. Data were binned into early (E) or late (L) stages with paired-data indicated by a

colored line to highlight the difference between E and L for paired replicates. Means for each

condition are indicated by black bars with error bars representing 95% confidence intervals.

Slippage rates for all E-stage samples were statistically indistinguishable ( $p > 0.05$ ). The only

sample with a significant difference in slippage between E and L was the control (\*,  $p < 0.01$ );

data from paired samples are quantified in Table 2. For visualization, 2 datapoints from *zyx-1*Δ

E and 6 datapoints from *zyx-1*Δ L are not shown but were between 4.5 and 6.0 µm/min and

were included in the analysis.
